# Supplementary material for: Fluorescent phenothiazine-fused boron complexes for ratiometric hypochlorite imaging
Source: Royal Society of Chemistry journal article supplement (doi:10.1039/d2dt03824b), 2023-01-01
Supplement: d2dt03824b1.pdf [file d2dt03824b1.pdf]

Supporting Information  
*for*

## Fluorescent Phenothiazine-Boranil Complexes for Hypochlorite Sensing

Hong Wang,<sup>aΔ</sup> Changli Zhang,<sup>bΔ</sup> Zhiyong Jiang,<sup>c</sup> Li Xu,<sup>\*a</sup> and Zhipeng Liu<sup>\*c,d</sup>

<sup>a</sup> College of Science, Nanjing Forestry University, Nanjing 210037, China. Email: [xuliqby@njfu.edu.cn](mailto:xuliqby@njfu.edu.cn).

<sup>b</sup> School of Environmental Science, Nanjing Xiaozhuang University, Nanjing 211171, China.

<sup>c</sup> College of Materials Science and Engineering, Nanjing Forestry University, Nanjing 210037, China. Email: [zpliu@njfu.edu.cn](mailto:zpliu@njfu.edu.cn).

<sup>d</sup> Co-Innovation Center of Efficient Processing and Utilization of Forest Resources, Nanjing Forestry University, Nanjing 210037, China.

<sup>Δ</sup> These authors contribute equally to this work.

### Table of Contents

|                                                  |            |
|--------------------------------------------------|------------|
| <b>1. Methods and materials .....</b>            | <b>S2</b>  |
| <b>2. Synthesis.....</b>                         | <b>S2</b>  |
| <b>3. Photophysical properties .....</b>         | <b>S4</b>  |
| <b>4. Cell experiments.....</b>                  | <b>S5</b>  |
| <b>5. Supplementary tables and figures .....</b> | <b>S6</b>  |
| <b>6. References.....</b>                        | <b>S31</b> |

## 1. Methods and materials

Solvents were dried before use by conventional methods in organometallic chemistry. Commercially available chemicals were used as received. By using the Schlenk technique, all air sensitive compounds reacted under the protection of the inert gases. Flash column chromatography (100-200 mesh) was performed using silica gel purchased from Ding Kang Silica Gel Co. The  $^1\text{H}$  and  $^{13}\text{C}$  NMR spectra were recorded on a Bruker AV-600/-400 spectrometer at 600 MHz and 400 MHz for  $^1\text{H}$  NMR, and 150 MHz for  $^{13}\text{C}$  NMR. Chemical shifts in ppm compared to  $\text{Si}(\text{CH}_3)_4$  ( $^1\text{H}$ ) are reported.  $^1\text{H}$  NMR coupling constants ( $J$ ) are reported in Hertz (Hz), and multiplicities are expressed as follows: s (singlet), d (doublet), t (triplet), m (multiplet). High-resolution mass spectra (HRMS) were recorded on an LCQ (ESI-MS, thermo Finnigan) mass spectrometer. Confocal laser scanning microscopy (CLSM) images were performed on a Zeiss LSM710 confocal laser scanning microscope.

## 2. Synthesis

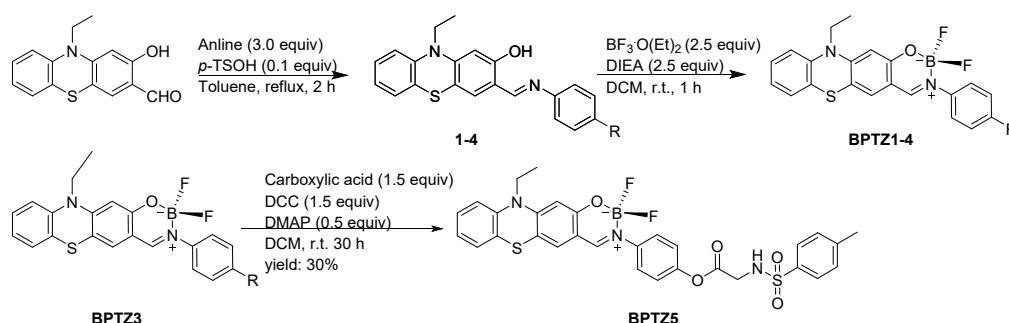

Scheme S1. Synthesis of Probes.

### Synthesis of compounds 1-4

10-ethyl-2-hydroxy-3-carbaldehyde-10H-phenothiazine was prepared following a previous report<sup>1</sup>. To a solution of aniline (3 equiv) and *p*-TsOH (0.1 equiv) in dry toluene was added 10-ethyl-2-hydroxy-3-carbaldehyde-10H-phenothiazine (1 equiv). The resulting solution was refluxed for 1 h. After cooling down to room temperature, the resulting precipitate was filtered, recrystallized from ethanol, washed with n-hexane and dried under vacuum, to give the target product.

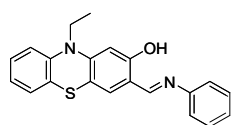

Compound 1: A dark red solid was obtained in 81% yield.  $^1\text{H}$  NMR (600 MHz,  $\text{CDCl}_3$ )  $\delta$ /ppm = 13.71(s, 1H), 8.43 (s, 1H), 7.40 (t,  $J$  = 7.8Hz, 2H), 7.24 (s, 1H), 7.19(t,  $J$  = 7.8Hz, 2H), 7.12(d,  $J$  = 7.2 Hz, 1H) 7.05 (s, 1H), 6.95–6.91 (m, 2H), 6.69 (d,  $J$  = 8.4 Hz, 1H), 6.51 (s, 1H), 3.98–3.95 (m, 2H), 1.46 (t,  $J$  = 6.6 Hz, 3H).  $^{13}\text{C}$  NMR (150 MHz,  $\text{CDCl}_3$ )  $\delta$ /ppm = 158.6, 141.6, 129.6, 128.2, 127.7, 127.4, 127.3, 126.7, 124.5, 124.0, 123.1, 120.9, 116.5, 116.1, 115.72, 42.6, 12.7. HRMS (ESI<sup>+</sup>): calcd. for  $\text{C}_{21}\text{H}_{18}\text{N}_2\text{OS}$ :  $[\text{M}-\text{H}]^-$  = 345.1056, found:  $[\text{M}-\text{H}]^-$  = 345.1072.

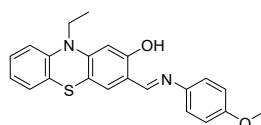

Compound 2: A yellow solid was obtained in 76% yield.  $^1\text{H}$  NMR (400 MHz,  $\text{CDCl}_3$ )  $\delta$ /ppm = 13.81 (s, 1H), 8.40 (s, 1H), 7.23 (d,  $J$  = 8.0 Hz, 2H), 7.17–7.10 (m, 2H), 7.02 (s, 1H), 6.93–6.89 (m, 4H), 6.50 (s, 1H), 3.97–3.92 (m, 2H), 3.83 (s, 3H), 1.45 (t,  $J$  = 6.8 Hz, 3H).  $^{13}\text{C}$  NMR (150 MHz,  $\text{CDCl}_3$ )  $\delta$ /ppm = 162.8, 158.5, 158.4, 149.2, 143.3, 141.1, 129.4, 127.3, 124.0, 123.0, 122.1, 115.6, 114.7, 114.4, 112.7, 103.7, 55.6, 42.5, 12.9. HRMS (ESI<sup>+</sup>): calcd. for  $\text{C}_{22}\text{H}_{20}\text{N}_2\text{O}_2\text{S}$ :  $[\text{M}]^-$  = 376.1245, found:  $[\text{M}]^-$  = 376.1208.

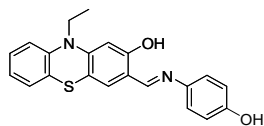

Compound **3**: A red solid was obtained in 95% yield.  $^1\text{H NMR}$  (400 MHz, DMSO)  $\delta/\text{ppm}$  = 13.83 (s, 1H), 9.60 (s, 1H), 8.73 (s, 1H), 7.29 (s, 1H), 7.24 (d,  $J$  = 7.6 Hz, 2H), 7.20 (d,  $J$  = 7.6 Hz, 1H), 7.15 (d,  $J$  = 7.6 Hz, 1H), 7.06 (d,  $J$  = 8.0 Hz, 1H), 6.97 (t,  $J$  = 7.2 Hz, 1H), 6.81 (d,  $J$  = 8.0 Hz, 2H), 6.53 (s, 1H), 3.98–3.93 (m, 2H), 1.32 (t,  $J$  = 6.4 Hz, 3H).  $^{13}\text{C NMR}$  (150 MHz,  $\text{CDCl}_3$ )  $\delta/\text{ppm}$  = 161.8, 158.5, 156.5, 148.3, 142.7, 139.0, 129.4, 127.6, 127.0, 122.9, 122.8, 122.2, 115.9, 114.3, 111.3, 103.3, 41.6, 12.5. **HRMS** ( $\text{ESI}^+$ ): calcd. for  $\text{C}_{21}\text{H}_{18}\text{N}_2\text{O}_2\text{S}$ :  $[\text{M}-\text{H}]^-$  = 361.1005, found:  $[\text{M}-\text{H}]^-$  = 361.1021.

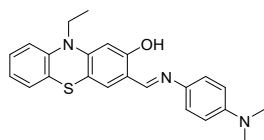

Compound **4**: A dark yellow solid was obtained in 97% yield.  $^1\text{H NMR}$  (400 MHz,  $\text{CDCl}_3$ )  $\delta/\text{ppm}$  = 14.17 (s, 1H), 8.41 (s, 1H), 7.23 (d,  $J$  = 8.8 Hz, 2H), 7.17–7.11 (m, 2H), 7.01 (s, 1H), 6.94–6.90 (m, 2H), 6.74 (d,  $J$  = 8.8 Hz, 2H), 6.49 (s, 1H), 3.98–3.93 (m, 2H), 2.99 (s, 6H), 1.46 (t,  $J$  = 6.8 Hz, 3H).  $^{13}\text{C NMR}$  (150 MHz,  $\text{CDCl}_3$ )  $\delta/\text{ppm}$  = 163.0, 155.9, 149.7, 148.8, 143.5, 136.7, 129.1, 127.3, 124.1, 122.8, 121.9, 115.5, 114.7, 113.0, 112.5, 103.8, 42.4, 40.7, 13.0. **HRMS** ( $\text{ESI}^+$ ): calcd. for  $\text{C}_{23}\text{H}_{23}\text{N}_3\text{OS}$ :  $[\text{M}]^-$  = 389.1562, found:  $[\text{M}]^-$  = 389.1527.

#### Synthesis of BPTZ1-4

To a stirred solution of compounds **1-4** (1equiv) in dry dichloroethane (DCM) at room temperature was added  $\text{BF}_3 \cdot \text{OEt}_2$  (2.5 equiv).<sup>2</sup> A color change occurs reveals the formation of an intermediary. After 15 minutes, *N,N*-diisopropylethylamine (2.5 equiv) is added to form the desired boranil. After cooling down to room temperature, the resulting mixture was washed with a saturated solution of  $\text{NaHCO}_3$ , then extracted with DCM and washed with brine. Organic layers were dried over  $\text{MgSO}_4$  and evaporated under vacuum. The product was purified by silica gel chromatography.

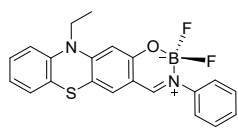

**BPTZ1**: A dark red solid was obtained in 70% yield (DCM).  $^1\text{H NMR}$  (600 MHz,  $\text{CDCl}_3$ )  $\delta/\text{ppm}$  = 8.11 (s, 1H), 7.53 (d,  $J$  = 7.8 Hz, 2H), 7.48–7.39 (m, 2H), 7.42 (t,  $J$  = 7.8 Hz, 1H), 7.20–7.17 (m, 1H), 7.10 (dd,  $J$  = 7.2, 1.2 Hz, 1H), 7.02 (s, 1H), 7.00–6.97 (m, 2H), 6.49 (s, 1H), 3.99–3.96 (m, 2H), 1.47 (t,  $J$  = 7.2 Hz, 3H).  $^{13}\text{C NMR}$  (150 MHz,  $\text{CDCl}_3$ )  $\delta/\text{ppm}$  = 161.3, 159.7, 154.5, 142.8, 141.5, 129.7, 128.7, 128.4, 127.8, 127.3, 124.0, 123.5, 123.0, 116.4, 115.1, 111.1, 103.6, 43.3, 12.7. **HRMS** ( $\text{ESI}^+$ ): calcd. for  $\text{C}_{21}\text{H}_{17}\text{BF}_2\text{N}_2\text{O}_2\text{S}$ :  $[\text{M} + \text{Na}]^+$  = 437.1015, found:  $[\text{M} + \text{Na}]^+$  = 437.1012.

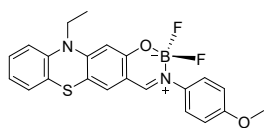

**BPTZ2**: A red solid was obtained in 57% yield (petroleum ether (P): DCM = 1: 5, v/v).  $^1\text{H NMR}$  (600 MHz,  $\text{CDCl}_3$ )  $\delta/\text{ppm}$  = 8.07 (s, 1H), 7.45 (d,  $J$  = 9.0 Hz, 2H), 7.20–7.17 (m, 1H), 7.09 (dd,  $J$  = 7.2, 1.2 Hz, 1H), 7.02 (s, 1H), 7.00–6.98 (m, 1H), 6.97–6.95 (m, 3H), 6.50 (s, 1H), 3.99–3.96 (m, 2H), 3.84 (s, 3H), 1.47 (t,  $J$  = 7.2 Hz, 3H).  $^{13}\text{C NMR}$  (150 MHz,  $\text{CDCl}_3$ )  $\delta/\text{ppm}$  = 161.1, 159.9, 158.7, 154.2, 141.6, 135.9, 128.2, 127.8, 127.3, 124.6, 124.0, 123.0, 116.3, 115.0, 114.8, 111.2, 103.7, 55.7, 43.3, 12.8. **HRMS** ( $\text{ESI}^+$ ): calcd. for  $\text{C}_{22}\text{H}_{19}\text{BF}_2\text{N}_2\text{O}_2\text{S}$ :  $[\text{M} + \text{Na}]^+$  = 447.1120, found:  $[\text{M} + \text{Na}]^+$  = 440.1142.

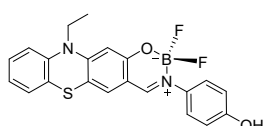

**BPTZ3**: A red solid was obtained in 54% yield (ethyl acetate (EA): DCM = 1: 10, v/v).  $^1\text{H NMR}$  (600 MHz, DMSO)  $\delta/\text{ppm}$  = 8.07 (s, 1H), 7.39 (d,  $J$  = 9.0 Hz, 2H), 7.19–7.16 (m, 1H), 7.09 (dd,  $J$  = 7.8, 1.8 Hz, 1H), 7.05 (s, 1H), 7.00–6.96 (m, 2H), 6.90–6.89 (m, 2H), 6.53 (s, 1H), 5.05 (s, 1H), 4.00–3.97 (m, 2H), 1.48 (t,  $J$  = 7.2 Hz, 3H).  $^{13}\text{C NMR}$  (150 MHz,  $\text{CDCl}_3$ )  $\delta/\text{ppm}$  = 160.7, 159.7, 157.6, 153.0, 141.2, 134.0, 129.4, 127.9, 127.0, 124.4, 123.8, 121.8, 116.5, 115.8, 113.1, 111.1, 103.1, 42.3, 12.3. **HRMS** ( $\text{ESI}^+$ ): calcd. for  $\text{C}_{21}\text{H}_{17}\text{BF}_2\text{N}_2\text{O}_2\text{S}$ :  $[\text{M}-\text{H}]^-$  = 409.0988, found:  $[\text{M}-\text{H}]^-$

=409.0992.

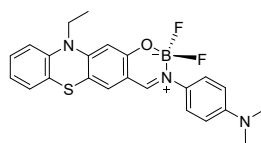

**BPTZ4:** A yellow solid was obtained in 95% yield (P: DCM =1: 5, v/v). **<sup>1</sup>H NMR** (600 MHz, CDCl<sub>3</sub>) δ/ppm = 8.06 (s, 1H), 7.40 (d, *J* = 9.0 Hz, 2H), 7.19–7.16 (m, 1H), 7.10–7.08 (m, 1H), 7.03 (s, 1H), 6.99–6.95 (m, 2H), 6.72 (d, *J* = 9.0 Hz, 2H), 6.52 (s, 1H), 3.99–3.95 (m, 2H), 3.00 (s, 6H), 1.47 (t, *J* = 6.6 Hz, 3H). **<sup>13</sup>C NMR** (150 MHz, CDCl<sub>3</sub>) δ/ppm = 160.6, 156.9, 153.6, 150.6, 141.9, 131.9, 128.0, 127.7, 127.3, 124.0, 123.8, 123.1, 116.1, 114.9, 112.5, 103.9, 43.3, 40.6, 12.8. **HRMS** (ESI<sup>+</sup>): calcd. for C<sub>23</sub>H<sub>22</sub>BF<sub>2</sub>N<sub>3</sub>OS: [M + Na]<sup>+</sup> = 460.1437, found: [M + Na]<sup>+</sup> = 460.1433.

### Synthesis of BPTZ5

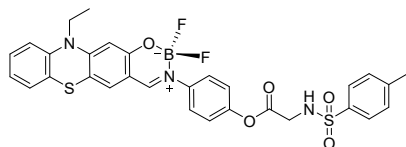

To a solution of compound **BPTZ3** (1 equiv) and *N*-*P*-Tosylglycine (1.5 equiv) in 10mL dry DCM in a 50 mL three-necked round-bottomed flask was added 4-dimethylaminopyridine (1 equiv) and dicyclohexylcarbodiimide (1 equiv)<sup>3</sup>. In N<sub>2</sub> atmosphere protection, the solvent was stirred at room temperature for 12 h. The reaction mixture was extracted with DCM three times and washed with saturated sodium chloride aqueous solution. Organic layers were dried over MgSO<sub>4</sub> and evaporated under vacuum. The product was purified by silica gel chromatography. A red solid was obtained in 30% yield (DCM: MeOH=10: 1, v/v). **<sup>1</sup>H NMR** (400 MHz, CDCl<sub>3</sub>) δ/ppm = 8.05 (s, 1H), 7.79 (d, *J* = 7.6 Hz, 2H), 7.48 (d, *J* = 8.0 Hz, 2H), 7.36–7.32 (m, 2H), 7.20–7.16 (m, 1H), 7.08 (d, *J* = 7.6 Hz, 1H), 7.02–6.98 (m, 5H), 6.85 (d, *J* = 8.0 Hz, 1H), 6.46 (d, *J* = 8.4 Hz, 1H), 4.06 (d, *J* = 4.8 Hz, 2H), 3.96–3.94 (m, 2H), 2.43 (s, 3H), 1.45 (t, *J* = 6.4 Hz, 3H). **<sup>13</sup>C NMR** (150 MHz, CDCl<sub>3</sub>) δ/ppm = 167.6, 159.6, 154.7, 149.9, 144.3, 141.2, 140.7, 136.3, 130.1, 128.4, 127.5, 127.3, 124.7, 124.2, 124.0, 122.8, 122.4, 116.4, 116.3, 116.2, 115.4, 103.5, 44.5, 43.5, 21.7, 12.7. **HRMS** (ESI<sup>+</sup>): calcd. for [M-H]<sup>-</sup> = 620.1291, found: [M-H]<sup>-</sup> = 620.1298.

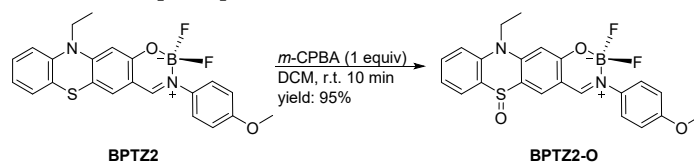

**Scheme S2.** Synthesis of **BPTZ2-O**.

To a 25 mL three-necked round-bottomed flask containing 5 mL dry DCM was added **BPTZ2** (1 equiv) and *m*-CPBA (1 equiv) in one portion. The mixture was stirred at room temperature for 10 min, and then extracted with DCM, and washed with sodium bicarbonate solution. Organic layers were evaporated under vacuum and washed with ether. A yellow solid was obtained in 95% yield. **<sup>1</sup>H NMR** (400 MHz, CDCl<sub>3</sub>) δ/ppm = 8.41 (s, 1H), 8.11 (s, 1H), 7.96 (d, *J* = 8.0 Hz, 1H), 7.69 (t, *J* = 7.6 Hz, 1H), 7.51 (d, *J* = 8.8 Hz, 3H), 7.36 (t, *J* = 7.2 Hz, 1H), 7.03–6.99 (m, 3H), 4.35–4.30 (m, 2H), 3.87 (s, 3H), 1.62 (t, *J* = 6.8 Hz, 3H). **<sup>13</sup>C NMR** (150 MHz, CDCl<sub>3</sub>) δ/ppm = 161.8, 160.4, 159.8, 145.5, 138.4, 137.2, 135.3, 133.7, 132.1, 131.0, 125.0, 124.6, 123.6, 118.8, 116.6, 114.9, 103.9, 55.8, 43.8, 12.0. **HRMS** (ESI<sup>+</sup>): calcd. for [M + H]<sup>+</sup> = 441.1251, found: [M + H]<sup>+</sup> = 441.1270, calcd. for [M + Na]<sup>+</sup> = 463.1070, found: [M + Na]<sup>+</sup> = 463.1091.

### 3. Photophysical properties

Absorption spectra were tested using a Shimadzu UV-1750 spectrophotometer. Fluorescence spectra were measured on a FLUOROMAX-4 spectrophotometer, slit width = 2 nm for excitation

and emission. 10 mM probe stock solution was prepared with DMF as a solvent. Dilute the stock solution with DMF/PBS buffer (1: 4, v/v, pH = 7.4, 0.4% Tween 80).  $\text{OCl}^-$  was prepared by diluting commercial NaClO solutions with PBS (10 mM, pH = 7.4). The concentration of  $\text{OCl}^-$  was determined by UV analysis with the extinction coefficient at 292 nm ( $\epsilon = 350 \text{ M}^{-1}\text{cm}^{-1}$ ). Analytes for selectivity investigation were prepared according to the reported literature.<sup>4</sup>

PL spectra addition:  $\lambda_{\text{ex}} = 420 \text{ nm}$  for **BPTZ1**;  $\lambda_{\text{ex}} = 426 \text{ nm}$  for **BPTZ2**;  $\lambda_{\text{ex}} = 412 \text{ nm}$  for **BPTZ3**;  $\lambda_{\text{ex}} = 428 \text{ nm}$  for **BPTZ4** and  $\lambda_{\text{ex}} = 415 \text{ nm}$  for **BPTZ5**. The above excitation slit is 2 nm.

## 4. Cell experiments

### 4.1 Cell incubation

RAW264.7 cells were obtained from the American Type Culture Collection (ATCC). The cells were cultured in RPMI-1640 medium supplemented with 10% fetal bovine serum, penicillin (100 units/mL), streptomycin (100 mg/mL), and 5%  $\text{CO}_2$  at 37°C. The cells were maintained in an exponential growth phase by periodic subcultivation. The cell density was determined using a hemocytometer, and this was performed prior to any experiments.

### 4.2 In vitro Cytotoxicity

Rat pheochromocytoma (PC12) cells, human Embryonic Kidney 293T (293T) cells and human brain astroblastoma (U87MG) cells were incubated in 96 well plates, next treated with various concentrations of **BPTZ5** (0, 1, 2, 5, 10, 20, 30, 50  $\mu\text{M}$ , in 200  $\mu\text{L}$  DMEM (containing 10% FBS and 1% DMSO)). The experimental group and control group were incubated at 37°C, 5% carbon dioxide and 95% air atmosphere for 48 h. Then 20  $\mu\text{L}$  MTT solution (5.0 mg/mL) was added to each hole. After 4 h incubation under the same conditions, the supernatant was removed and 150  $\mu\text{L}$  DMSO was added. The cells were shaken at low speed for 10 min, and the absorbance at 490 nm was measured with a microplate reader (Synergy 2, BioTek Instruments Inc). Cell survival rate was determined by  $A/A_0 \times 100\%$  ( $A_0$  and  $A$  respectively are the absorbance of the control group and experimental group).

### 4.3 Cell imaging

Mouse leukemia cells of monocyte macrophage (RAW264.7) cells were divided into five groups.

- 1) RAW264.7 cells were treated with 5  $\mu\text{M}$  **BPTZ5** and incubated for 30 minutes.
- 2) RAW264.7 cells were pretreated with ABH (250  $\mu\text{M}$ ) for 4 h, then 5  $\mu\text{M}$  **BPTZ5** was added and incubated for 30 minutes.
- 3) RAW264.7 cells were pretreated with ABH (250  $\mu\text{M}$ ) for 4 h. Next, 20  $\mu\text{g}\cdot\text{mL}^{-1}$  LPS and 5  $\mu\text{g}\cdot\text{mL}^{-1}$  PMA were added and incubated for 12 h. Then 5  $\mu\text{M}$  **BPTZ5** was added and incubated for 30 minutes.
- 4) RAW264.7 cells were pretreated with ABH (250  $\mu\text{M}$ ) 4 h. Next, 80  $\mu\text{M}$  NaClO was added and incubated for 4 h. Then 5  $\mu\text{M}$  **BPTZ5** was added and incubated for 30 minutes.
- 5) RAW264.7 cells were pretreated with ABH (250  $\mu\text{M}$ ) for 4 h. Next, 20  $\mu\text{g}\cdot\text{mL}^{-1}$  LPS and 5  $\mu\text{g}\cdot\text{mL}^{-1}$  PMA were added and incubated for 12 h. Then ABH (250  $\mu\text{M}$ ) was added and incubated for 4 h. Finally, 5  $\mu\text{M}$  **BPTZ5** was added and incubated for 30 minutes.

The cell samples were imaged on confocal microscopy (Zeiss LSM710) with the excitation at 415 nm (emission 450–580 nm) and 415 nm (emission 590–700 nm), respectively.

## 5. Supplementary tables and figures

**Table S1.** Photophysical data of **BPTZ1-5** in DCM.

| Cpd          | $\lambda_{\text{abs}}$ (nm) | $\epsilon$ ( $\text{M}^{-1} \text{cm}^{-1}$ ) | $\lambda_{\text{em}}$ (nm) | $\Phi_f$ (%) |
|--------------|-----------------------------|-----------------------------------------------|----------------------------|--------------|
| <b>BPTZ1</b> | 312/458                     | 26000/21000                                   | 634                        | 16.1%        |
| <b>BPTZ2</b> | 326/458                     | 23000/24000                                   | 629                        | 24.5%        |
| <b>BPTZ3</b> | 325/457                     | 22000/22000                                   | 628                        | 21.6%        |
| <b>BPTZ4</b> | 288/475                     | 22000/34000                                   | 619                        | 25.1%        |
| <b>BPTZ5</b> | 313/460                     | 22000/21000                                   | 634                        | 16.2%        |

<sup>a</sup>Data obtained at 343 K. <sup>b</sup>Determined using coumarin 6 ( $\Phi_f = 80\%$ ) as the reference.

**Table S2.** Photophysical data of **BPTZ1** in different solvents.

| Solvent                        | $\lambda_{\text{abs}}$ (nm) | $\varepsilon$ ( $\text{M}^{-1} \text{cm}^{-1}$ ) | $\lambda_{\text{em}}$ (nm) |
|--------------------------------|-----------------------------|--------------------------------------------------|----------------------------|
| Toluene                        | 312/454                     | 24000/20000                                      | 603                        |
| Dichloromethane                | 312/458                     | 26000/21000                                      | 634                        |
| Tetrahydrofuran                | 312/447                     | 27000/20000                                      | 620                        |
| Ethyl acetate                  | 310/442                     | 27000/21000                                      | 618                        |
| 1,4-Dioxane                    | 312/448                     | 26000/20000                                      | 610                        |
| Acetonitrile                   | 307/446                     | 14000/19000                                      | 645                        |
| <i>N, N</i> -dimethylformamide | 310/448                     | 24000/19000                                      | 646                        |
| Dimethyl sulfoxide             | 312/449                     | 25000/17000                                      | 650                        |

**Table S3.** Photophysical data of **BPTZ2** in different solvents.

| Solvent                        | $\lambda_{\text{abs}}$ (nm) | $\epsilon$ ( $\text{M}^{-1} \text{cm}^{-1}$ ) | $\lambda_{\text{em}}$ (nm) |
|--------------------------------|-----------------------------|-----------------------------------------------|----------------------------|
| Toluene                        | 326/454                     | 20000/22000                                   | 597                        |
| Dichloromethane                | 326/458                     | 23000/25000                                   | 629                        |
| Tetrahydrofuran                | 324/447                     | 27000/27000                                   | 611                        |
| Ethyl acetate                  | 322/443                     | 22000/23000                                   | 608                        |
| 1,4-Dioxane                    | 325/448                     | 22000/22000                                   | 604                        |
| Acetonitrile                   | 319/446                     | 14000/22000                                   | 637                        |
| <i>N, N</i> -dimethylformamide | 320/448                     | 20000/21000                                   | 638                        |
| Dimethyl sulfoxide             | 325/449                     | 22000/21000                                   | 645                        |



**Table S4.** Photophysical data of **BPTZ3** in different solvents.

| Solvent                        | $\lambda_{\text{abs}}$ (nm) | $\epsilon$ ( $\text{M}^{-1} \text{cm}^{-1}$ ) | $\lambda_{\text{em}}$ (nm) |
|--------------------------------|-----------------------------|-----------------------------------------------|----------------------------|
| Toluene                        | 323/451                     | 16000/21000                                   | 594                        |
| Dichloromethane                | 325/457                     | 21000/23000                                   | 628                        |
| Tetrahydrofuran                | 325/448                     | 19000/21000                                   | 608                        |
| Ethyl acetate                  | 320/442                     | 17000/20000                                   | 606                        |
| 1,4-Dioxane                    | 321/448                     | 17000/21000                                   | 602                        |
| Acetonitrile                   | 324/445                     | 12000/20000                                   | 638                        |
| <i>N, N</i> -dimethylformamide | 326/447                     | 20000/21000                                   | 633                        |
| Dimethyl sulfoxide             | 326/449                     | 18000/20000                                   | 640                        |

**Table S5.** Photophysical data of **BPTZ4** in different solvents.

| Solvent                        | $\lambda_{\text{abs}}$ (nm) | $\varepsilon$ ( $\text{M}^{-1} \text{cm}^{-1}$ ) | $\lambda_{\text{em}}$ (nm) |
|--------------------------------|-----------------------------|--------------------------------------------------|----------------------------|
| Toluene                        | 309/469                     | 15000/31000                                      | 591                        |
| Dichloromethane                | 288/475                     | 22000/34000                                      | 619                        |
| Tetrahydrofuran                | 312/463                     | 16000/32000                                      | 602                        |
| Ethyl acetate                  | 310/459                     | 15000/32000                                      | 600                        |
| 1,4-Dioxane                    | 313/463                     | 14000/30000                                      | 600                        |
| Acetonitrile                   | 304/463                     | 5000/30000                                       | 628                        |
| <i>N, N</i> -dimethylformamide | 310/467                     | 24000/30000                                      | 626                        |
| Dimethyl sulfoxide             | 288/469                     | 21000/30000                                      | 629                        |

**Table S6.** Photophysical data of **BPTZ5** in different solvents.

| Solvent                        | $\lambda_{\text{abs}}$ (nm) | $\epsilon$ ( $\text{M}^{-1} \text{cm}^{-1}$ ) | $\lambda_{\text{em}}$ (nm) |
|--------------------------------|-----------------------------|-----------------------------------------------|----------------------------|
| Toluene                        | 315/455                     | 18000/20000                                   | 605                        |
| Dichloromethane                | 313/460                     | 22000/21000                                   | 634                        |
| Tetrahydrofuran                | 312/449                     | 24000/20000                                   | 616                        |
| Ethyl acetate                  | 312/444                     | 25000/22000                                   | 614                        |
| 1,4-Dioxane                    | 313/449                     | 24000/20000                                   | 616                        |
| Acetonitrile                   | 313/447                     | 17000/20000                                   | 643                        |
| <i>N, N</i> -dimethylformamide | 313/448                     | 20000/21000                                   | 641                        |
| Dimethyl sulfoxide             | 313/451                     | 18000/19000                                   | 645                        |

**Table S7.** Summary of reported fluorescent probes for  $\text{OCl}^-$ .

| Ref. in SI | Probe                                                                                               | $\lambda_{\text{ex}}\lambda_{\text{em}}$ (nm) | Detection limit    | Application                                    |
|------------|-----------------------------------------------------------------------------------------------------|-----------------------------------------------|--------------------|------------------------------------------------|
| 5          | <b>TQE-SQ5</b><br>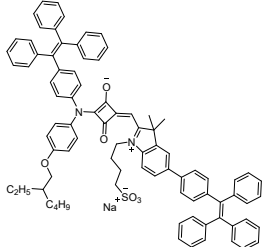 | 380<br>485/643                                | 5.6 nM             | Living cells                                   |
| 6          | <b>TQE-SQ3</b><br> | 529<br>650                                    | 105 nM             | Living cells                                   |
| 7          | <b>PDC</b><br>    | 415<br>503                                    | 16.1 nM            | Living cells and BALB/c mice with the OA model |
| 8          | <b>BPC1</b><br>  | 380<br>485                                    | 13 nM              | Living cells and zebrafish                     |
| 9          | <b>PBC</b><br>   | 385<br>520                                    | 6.82 nM            | Living cells                                   |
| 10         | <b>PZ-HA</b><br> | 450<br>650                                    | 0.72 $\mu\text{M}$ | Living cells and zebrafish                     |
| 11         | <b>HCP</b><br>   | 590<br>615                                    | 4.1 nM             | Living cells                                   |
| 12         | <b>Pz-Py</b><br> | 400<br>562                                    | 17.9 nM            | Living cells and living mice                   |

|             |                                                                                                      |                |               |                                          |
|-------------|------------------------------------------------------------------------------------------------------|----------------|---------------|------------------------------------------|
| 13          | <b>Cou-Lyso</b><br>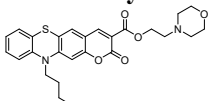 | 440<br>535/610 | 0.58 $\mu$ M  | Living cells<br>and<br>zebrafish         |
| 14          | <b>PI-Py</b><br>    | 500<br>515     | 1.7 nM        | Living cells                             |
| 15          | <b>PTC</b><br>      | 520<br>627     | 7.74 nM       | Living cells<br>and<br>zebrafish         |
| 16          | <b>PHPQ</b><br>     | 405<br>437/535 | 15 nM         | Living cells<br>and<br>zebrafish         |
| 17          | <b>PPS</b><br>      | 408<br>537     | 24 nM         | Living cells<br>and RA<br>mouse<br>model |
| 18          | <b>CIO-1</b><br>  | 450<br>562/635 | 1.12 nM       | Living cells                             |
| 19          | <b>TJ2</b><br>    | 500<br>594/730 | 2.3 nM        | Living cells                             |
| 20          | <b>ERC</b><br>    | 390<br>503/609 | 0.44 $\mu$ M  | Living cells                             |
| 21          | <b>P1</b><br>     | 480<br>620     | 42 nM         | Living cells<br>and<br>zebrafish         |
| 22          | <b>L1</b><br>     | 405<br>505     | 0.674 $\mu$ M | Living cells                             |
| Our<br>work | <b>BPTZ5</b><br>  | 415<br>515/630 | 21.1 nM       | Living cells                             |

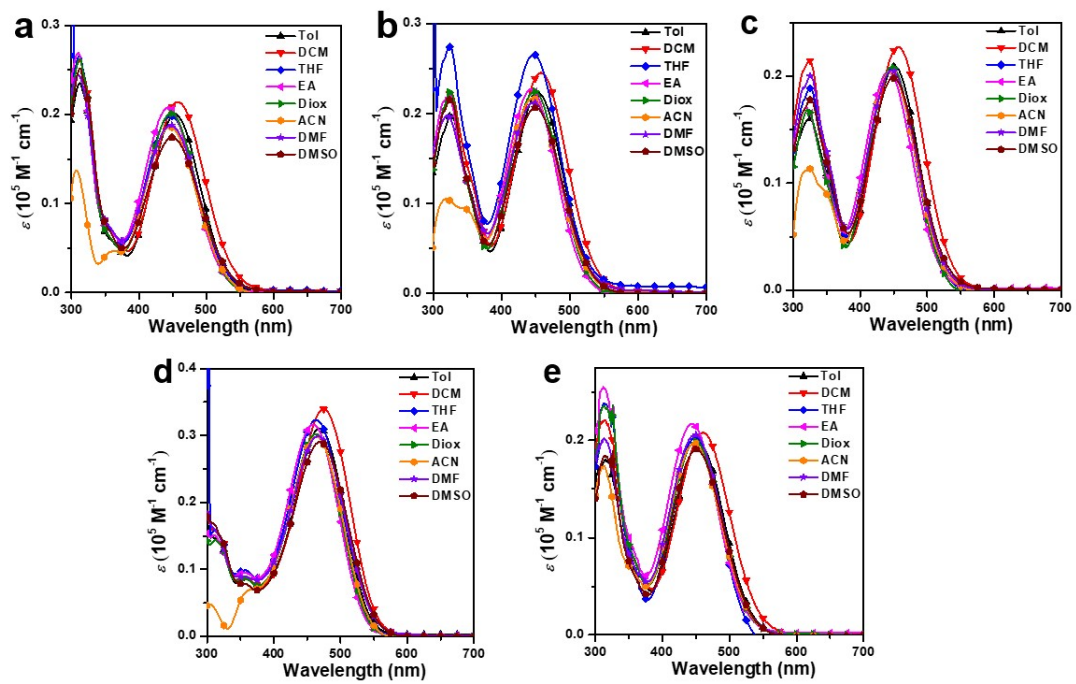

**Figure S1.** Absorption spectra of BPTZ1-5 (10  $\mu\text{M}$ ) in various solvents with different polarity.

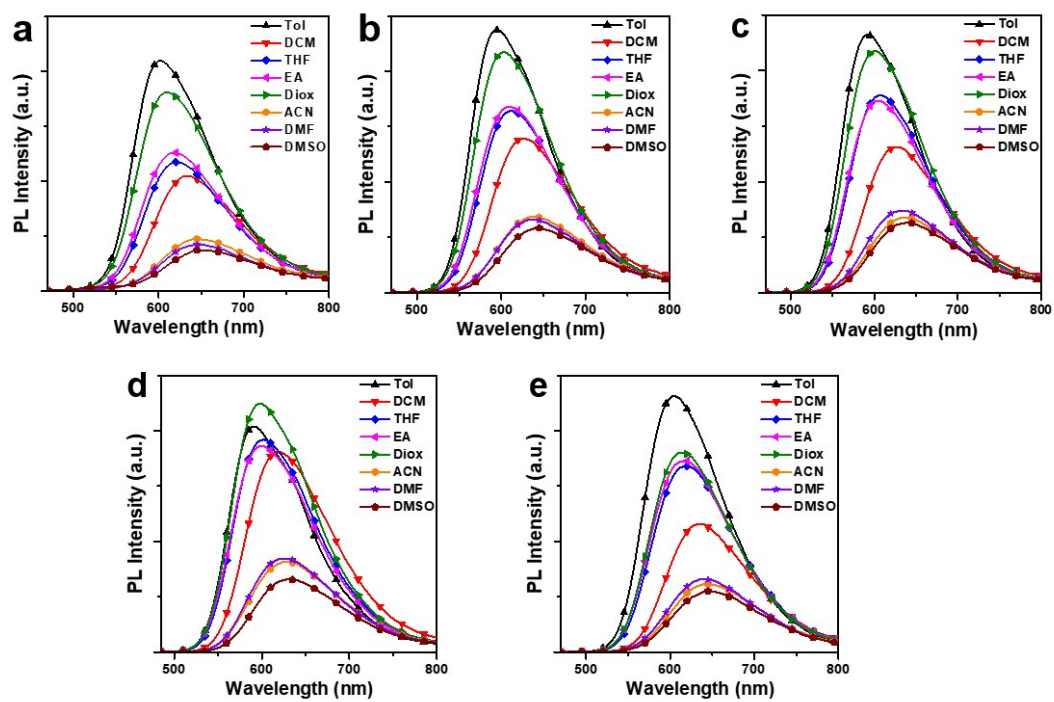

Figure S2. Emission spectra of BPTZ1-5 (10  $\mu\text{M}$ ) in various solvents.

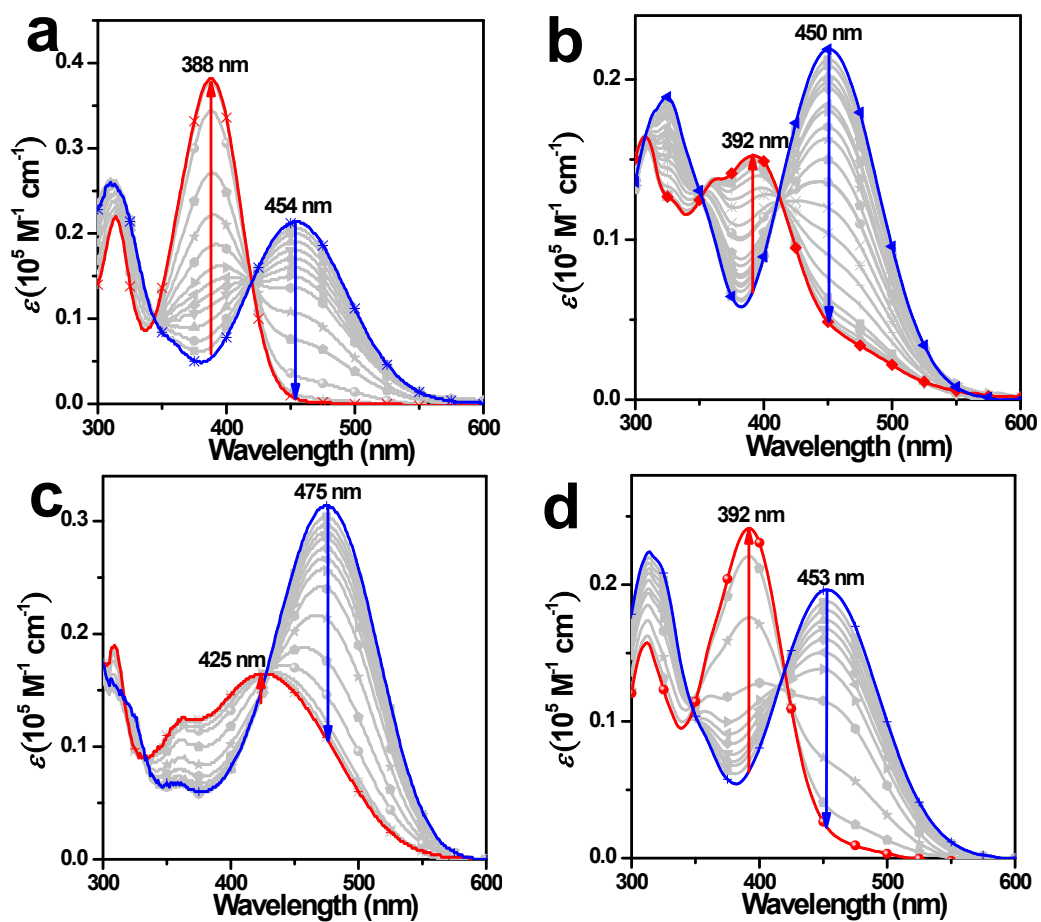

**Figure S3.** Absorption spectra changes of (a) BPTZ1, (b) BPTZ3, (c) BPTZ4, (d) BPTZ5 (5  $\mu\text{M}$ ) in the presence of increasing concentrations of  $\text{OCl}^-$  in DMF/PBS buffer at room temperature.



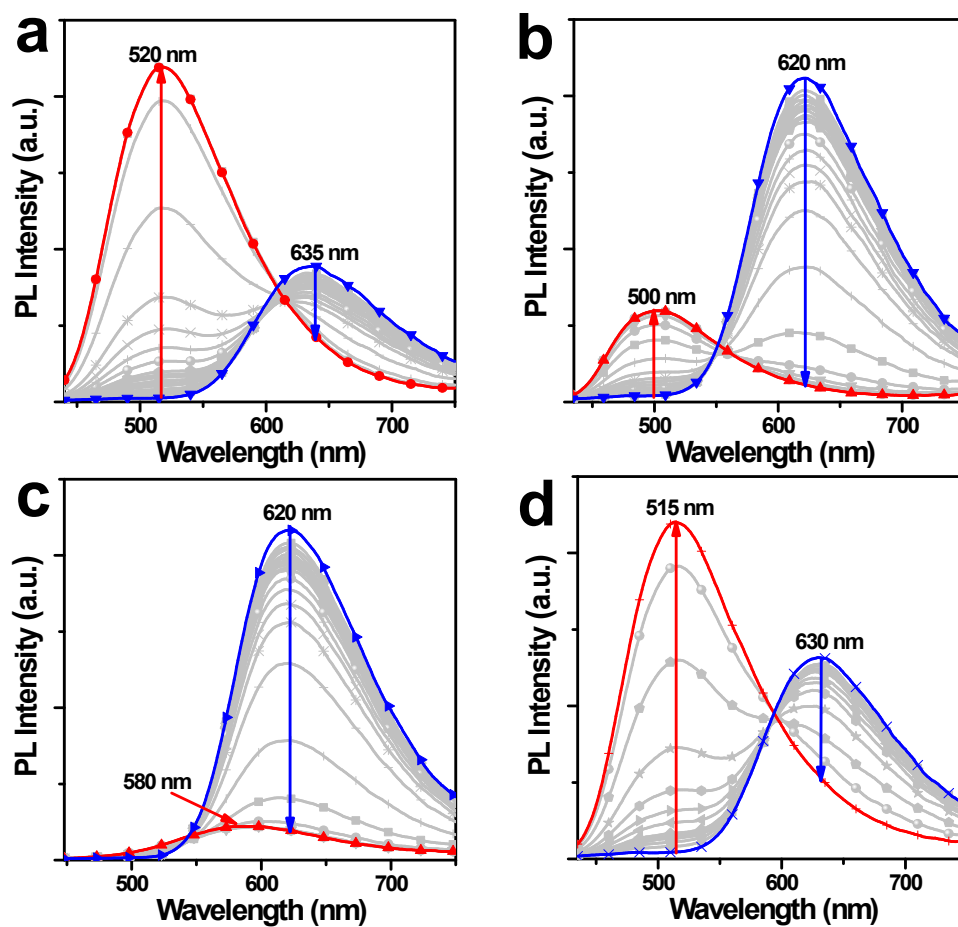

**Figure S4.** Emission spectra changes of (a) BPTZ1, (b) BPTZ3, (c) BPTZ4, (d) BPTZ5 ( $5 \mu\text{M}$ ) in the presence of increasing concentrations of  $\text{OCl}^-$  in DMF/PBS buffer at room temperature.

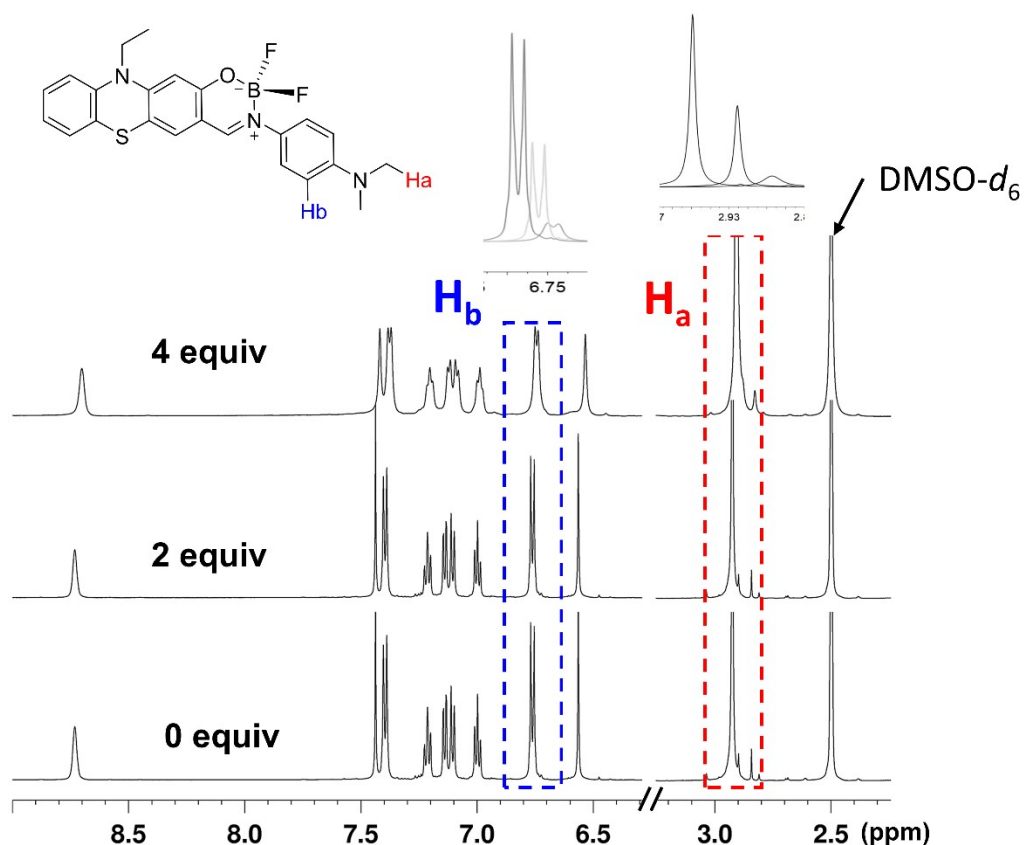

**Figure S5.** The  $^1\text{H}$  NMR spectra of **BPTZ4** (20 mM) in the presence of different concentrations of  $\text{OCl}^-$  in  $\text{DMSO-}d_6$ .

We carried out the  $^1\text{H}$  NMR titration experiments to confirm that the dimethylaminophenyl group was oxidized after the addition of hypochlorite.

As shown in Figure S5, the addition of hypochlorite to the solution of **BTPZ4** caused a distinct down-field shift for the signals of the protons in the dimethylamino group ( $\text{H}_a$ ) and the phenyl ring ( $\text{H}_b$ ), which suggests that the dimethylaminophenyl group was oxidized by hypochlorite. However, the oxidation products cannot be separated due to their highly unstable nature.

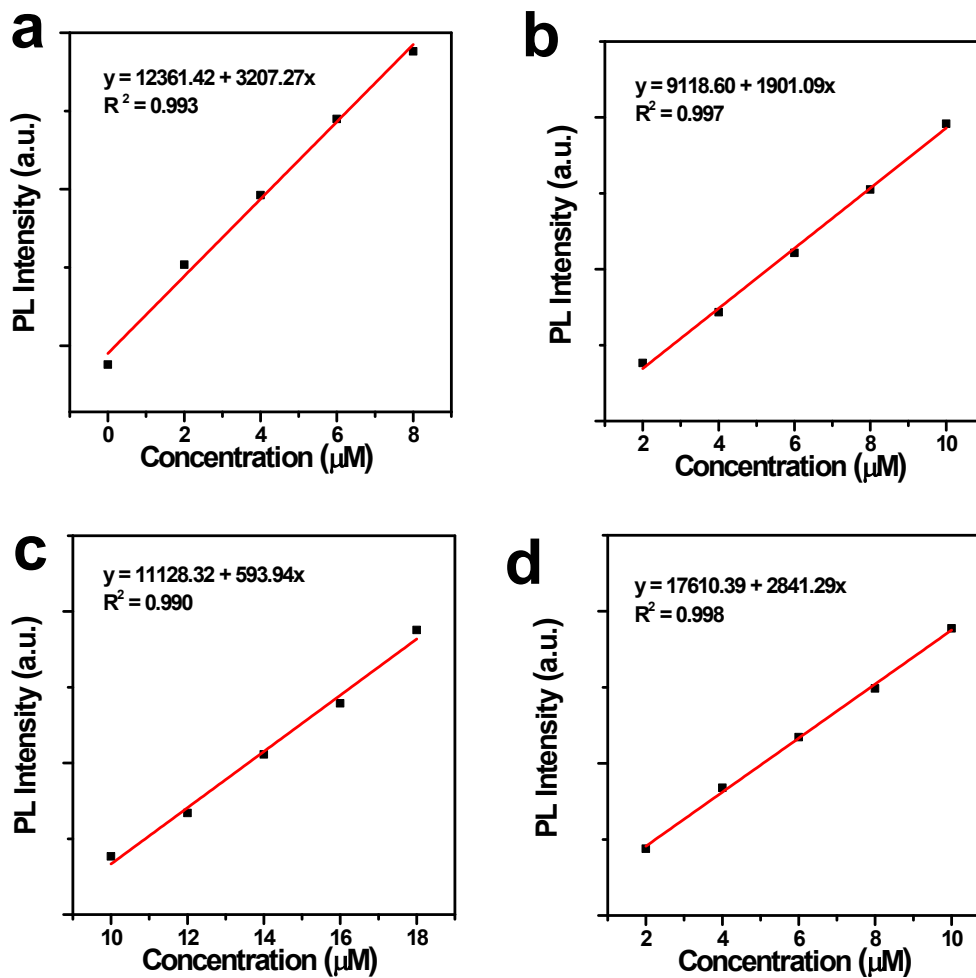

**Figure S6.** Calibration curve of emission intensity of (a) **BPTZ1** at 520 nm, (b) **BPTZ2** at 500 nm, (c) **BPTZ3** at 500 nm, (d) **BPTZ5** (5  $\mu$ M) at 515 nm.

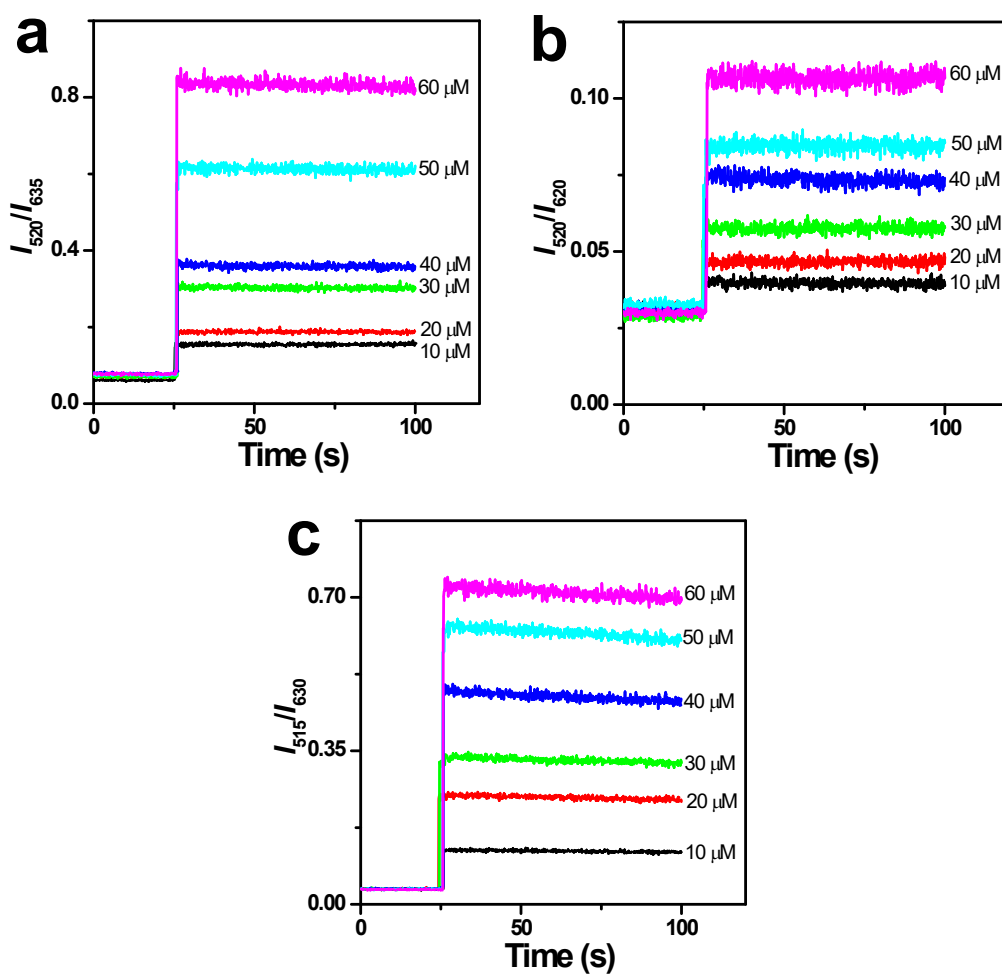

**Figure S7.** Time-dependent fluorescence intensity ratio of (a) **BPTZ1**, (b) **BPTZ3**, (c) **BPTZ5** (5  $\mu\text{M}$ ) with various concentrations of  $\text{OCl}^-$  in DMF/PBS buffer at room temperature.

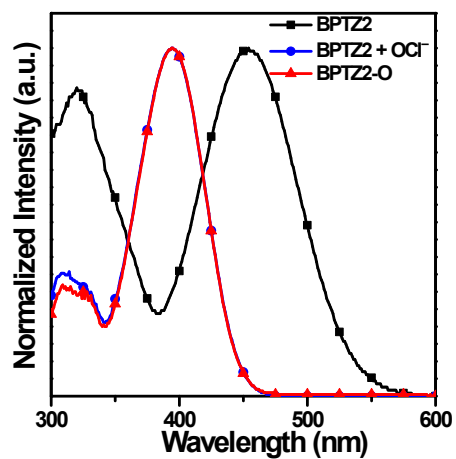

**Figure S8.** Absorption spectral of **BPTZ2** and **BPTZ2** treated with  $\text{OCl}^-$  in DMF/PBS buffer at room temperature. (The black line is **BPTZ2** ( $5 \mu\text{M}$ ), the blue line is **BPTZ2** ( $5 \mu\text{M}$ ) treated with  $\text{OCl}^-$  ( $120 \mu\text{M}$ ) for 2 min, and the red line is **BPTZ2-O** which is the corresponding product.

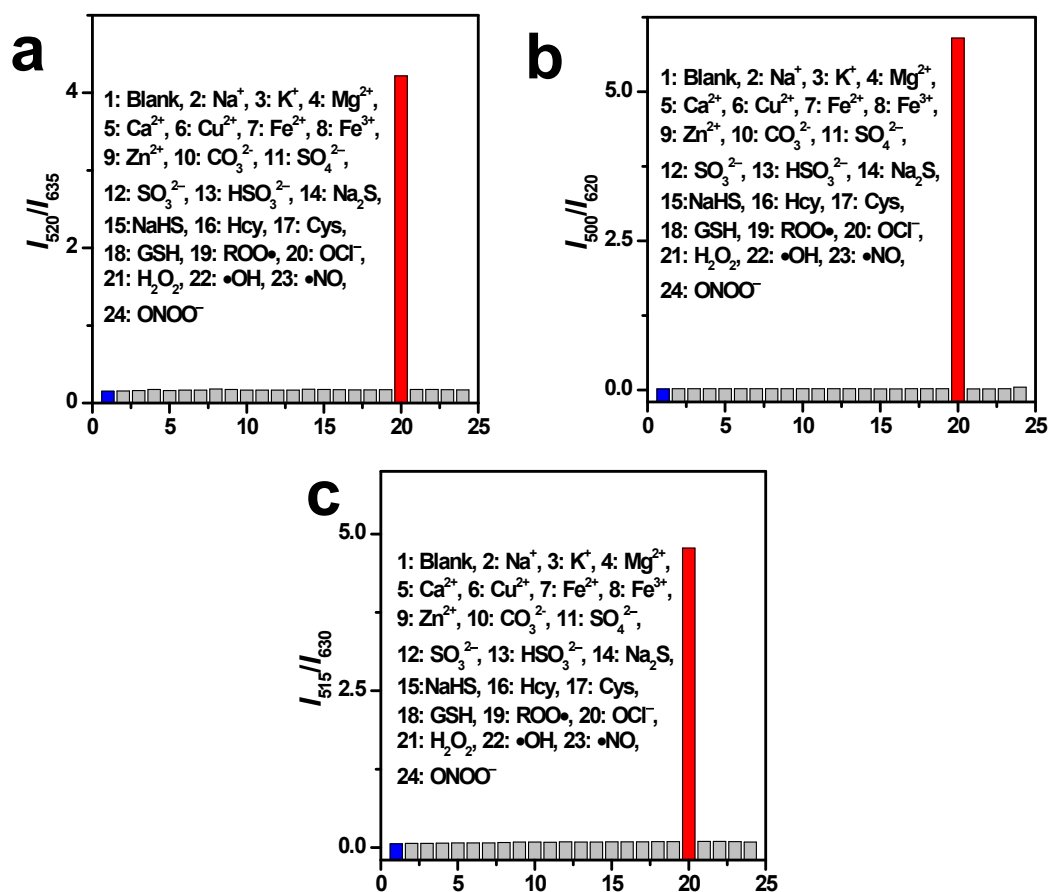

**Figure S9.** The fluorescence intensity ratio of (a) BPTZ1, (b) BPTZ3, (c) BPTZ5 (5  $\mu$ M) with 150  $\mu$ M OCl<sup>-</sup> and other analysts in DMF/PBS buffer at room temperature.

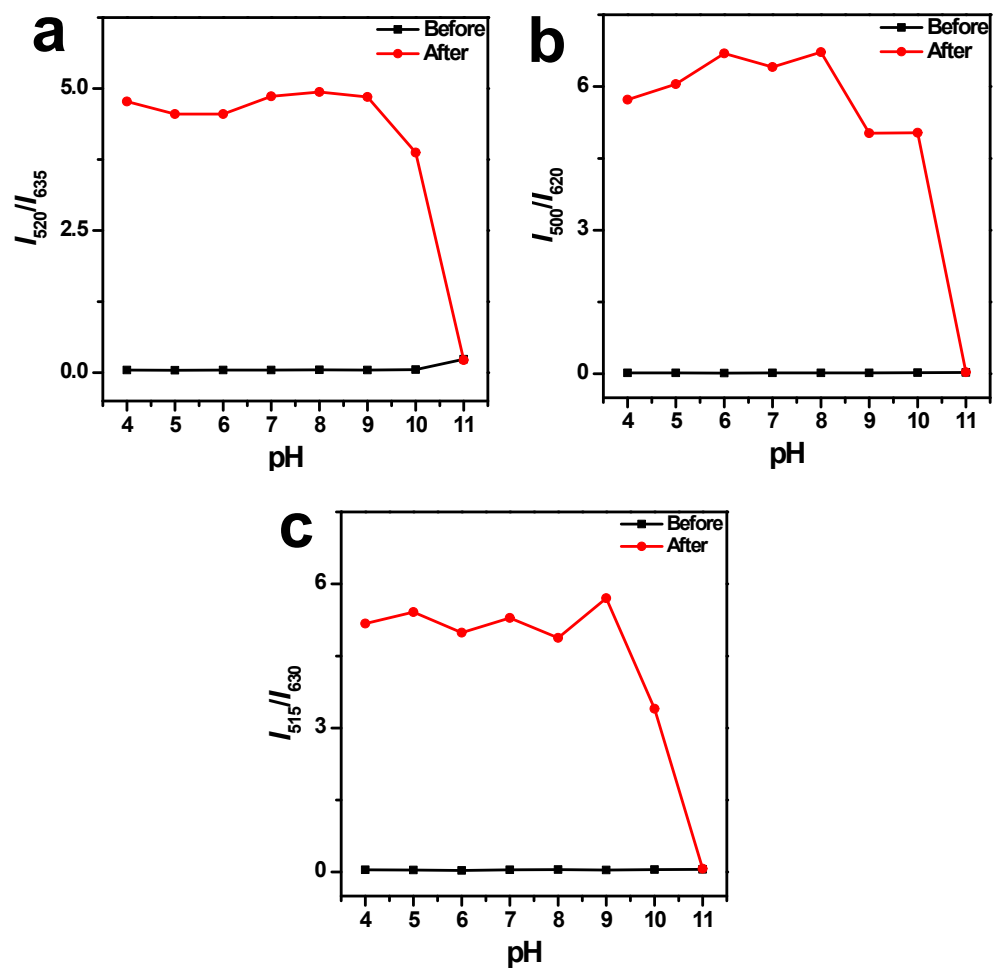

**Figure S10.** Effects of pH on the fluorescence intensity ratio of (a) **BPTZ1**, (b) **BPTZ3**, (c) **BPTZ5** (5  $\mu\text{M}$ ) with 150  $\mu\text{M}$   $\text{OCl}^-$  in DMF-water solution at room temperature.

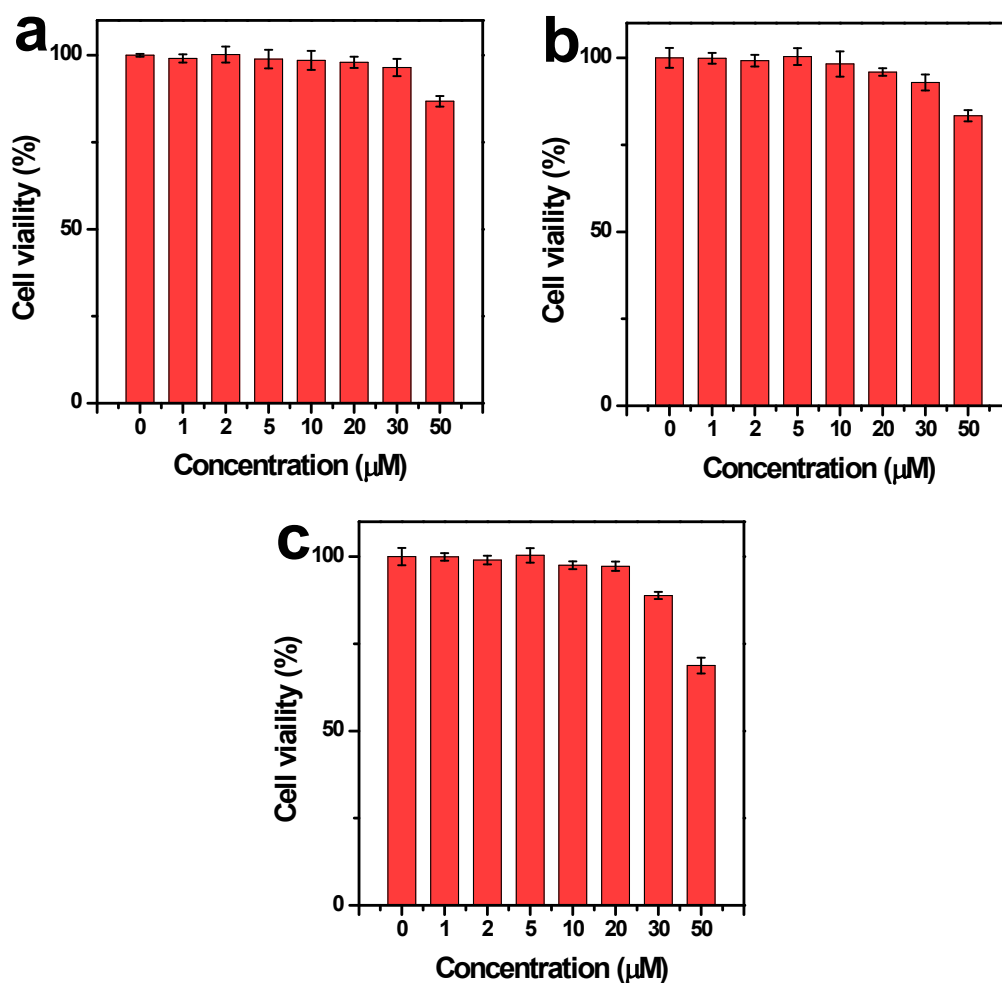

**Figure S11.** Cell viability of (a) PC12 (b) 293T (c) U87MG cells incubated with **BPTZ5** at various concentrations. Bars represent mean  $\pm$  s.d. derived from  $n = 6$  independent experiments.



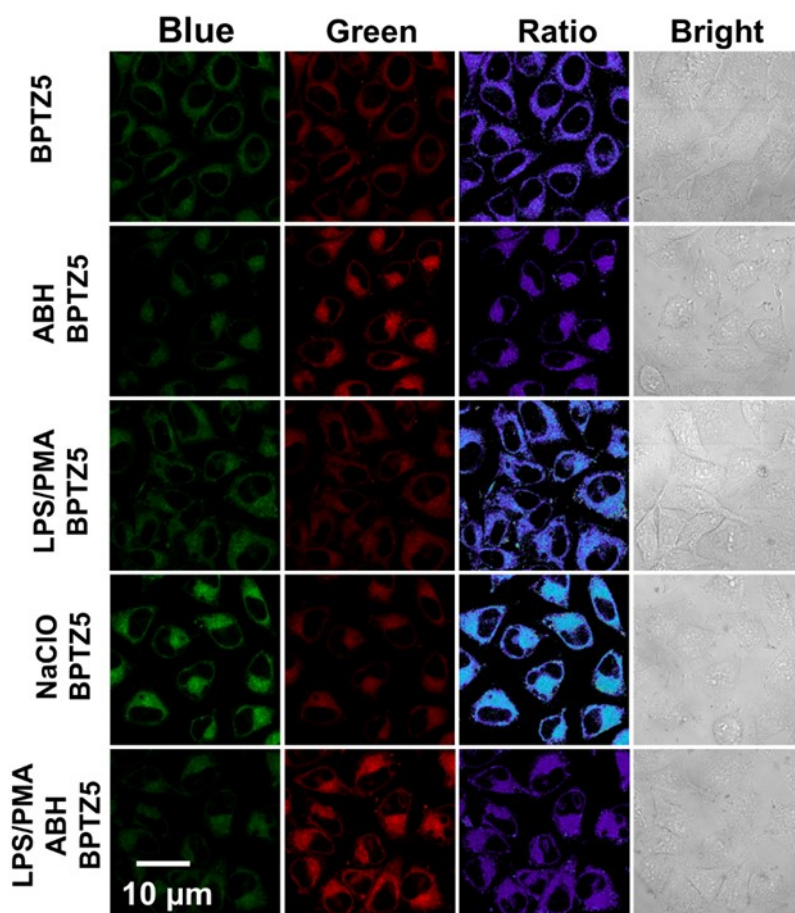

**Figure S12.** Confocal fluorescence images of **BPTZ5** in RAW264.7 cells under different conditions. **BPTZ5** group: cells were incubated with **BPTZ5** (5  $\mu\text{M}$ , 30 min), then imaged; **ABH + BPTZ5** group: cells were pretreated with  $\text{OCl}^-$  scavenger ABH (250  $\mu\text{M}$ , 4 h), next incubated with **BPTZ5** (5  $\mu\text{M}$ , 30 min), then imaged; **LPS + PMA + BPTZ5** group: cells were pretreated with  $\text{OCl}^-$  scavenger ABH (250  $\mu\text{M}$ , 4 h), next treated with LPS (5  $\mu\text{g}\cdot\text{mL}^{-1}$ ) and PMA (5  $\mu\text{g}\cdot\text{mL}^{-1}$ ) for 12 h, then incubated with **BPTZ5** (5  $\mu\text{M}$ , 30 min) and imaged; **NaClO + BPTZ5** group: cells were pretreated with  $\text{OCl}^-$  scavenger ABH (250  $\mu\text{M}$ , 4 h), next treated with NaClO (20  $\mu\text{M}$ , 4 h), then incubated with **BPTZ5** (5  $\mu\text{M}$ , 30 min) and imaged; **LPS + PMA + ABH + BPTZ5** group: cells were pretreated with  $\text{OCl}^-$  scavenger ABH (250  $\mu\text{M}$ , 4 h), next treated with LPS (5  $\mu\text{g}\cdot\text{mL}^{-1}$ ) and PMA (5  $\mu\text{g}\cdot\text{mL}^{-1}$ ) for 12 h, then treated with ABH (250  $\mu\text{M}$ , 4 h), finally incubated with **BPTZ5** (5  $\mu\text{M}$ , 30 min) and imaged. Scale bar: 10  $\mu\text{M}$ . (Blue channels:  $\lambda_{\text{ex}} = 415 \text{ nm}$ ,  $\lambda_{\text{em}} = 450\text{--}580 \text{ nm}$ . Green channels:  $\lambda_{\text{ex}} = 415 \text{ nm}$ ,  $\lambda_{\text{em}} = 590\text{--}700 \text{ nm}$ . Ratio:  $I_{\text{blue}}/I_{\text{green}}$ )

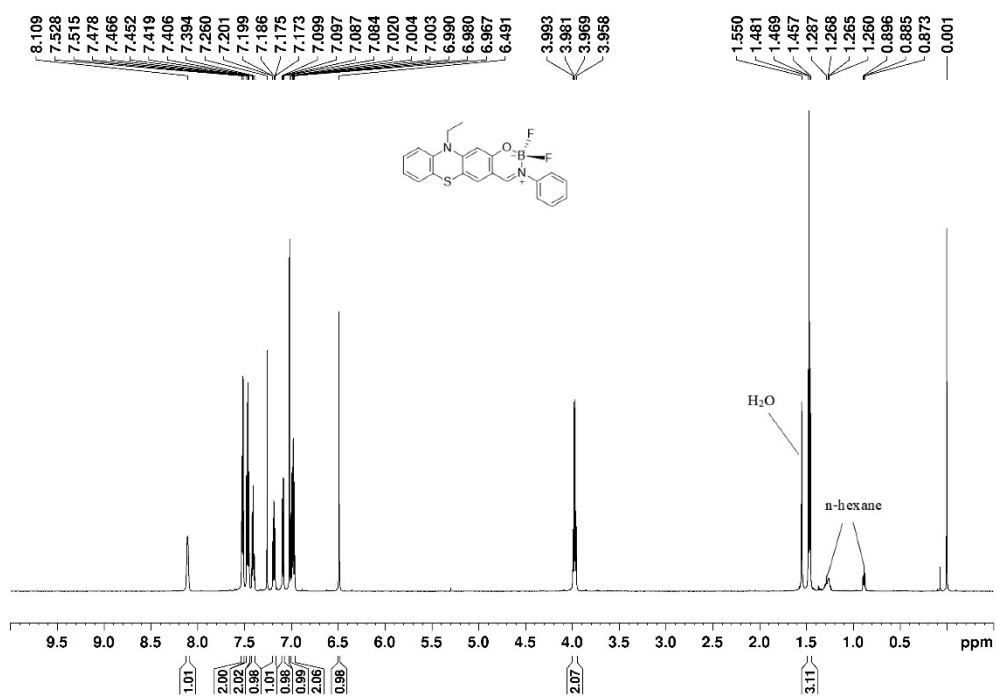

Figure S13. <sup>1</sup>H NMR spectrum of BPTZ1 in CDCl<sub>3</sub>.

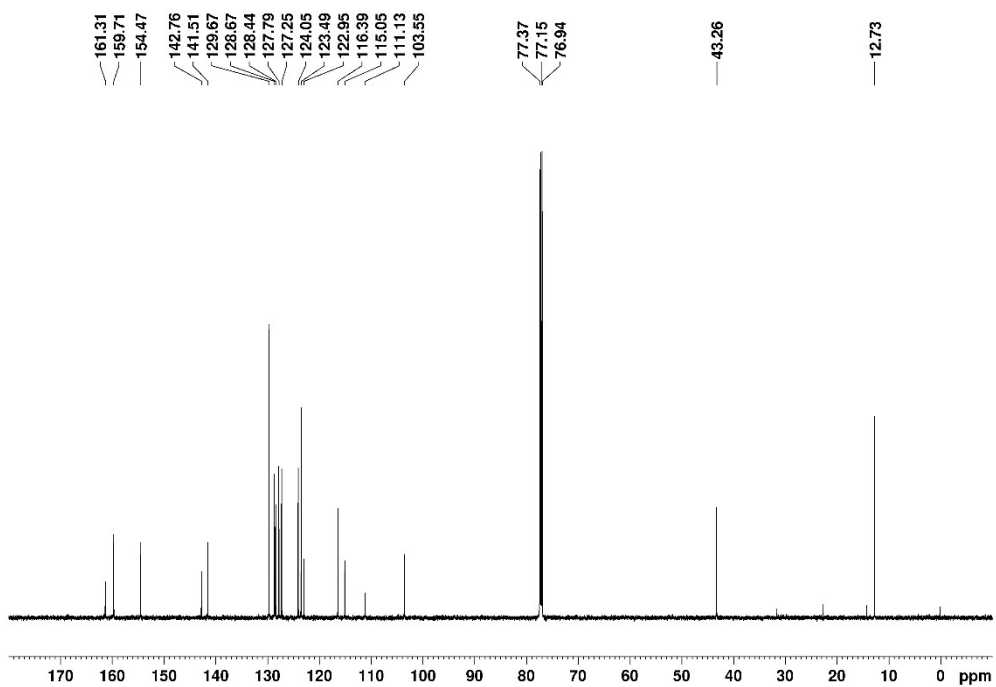

Figure S14. <sup>13</sup>C NMR spectrum of BPTZ1 in CDCl<sub>3</sub>.

BPTZ1 #35 RT: 0.29 AV: 1 NL: 1.47E6  
T: FTMS + p ESI Full ms [200.00-900.00]

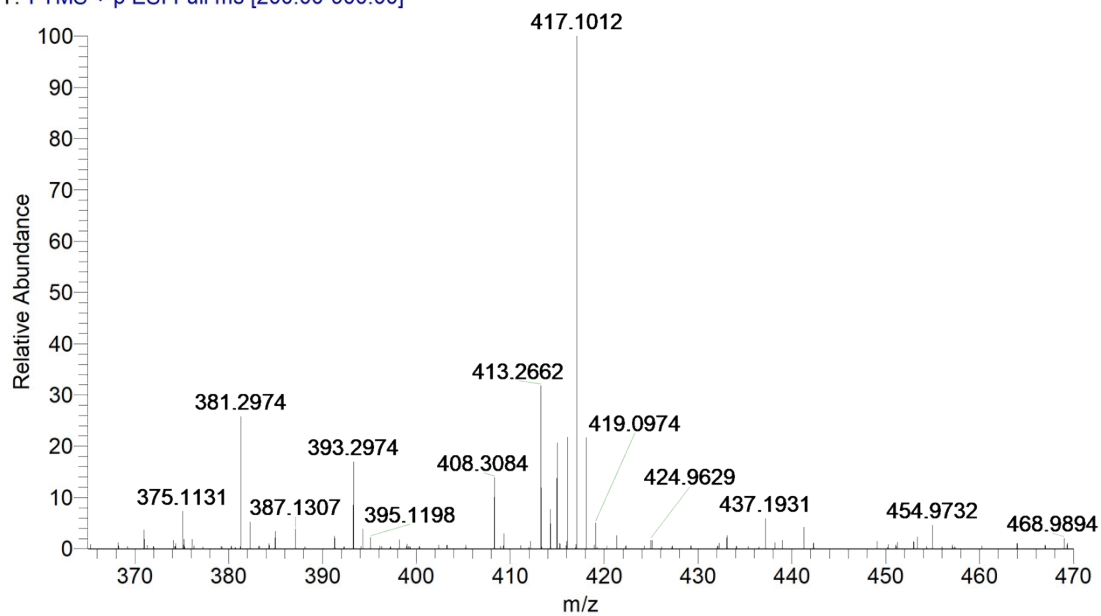

Figure S15. HRMS spectrum of BPTZ1.

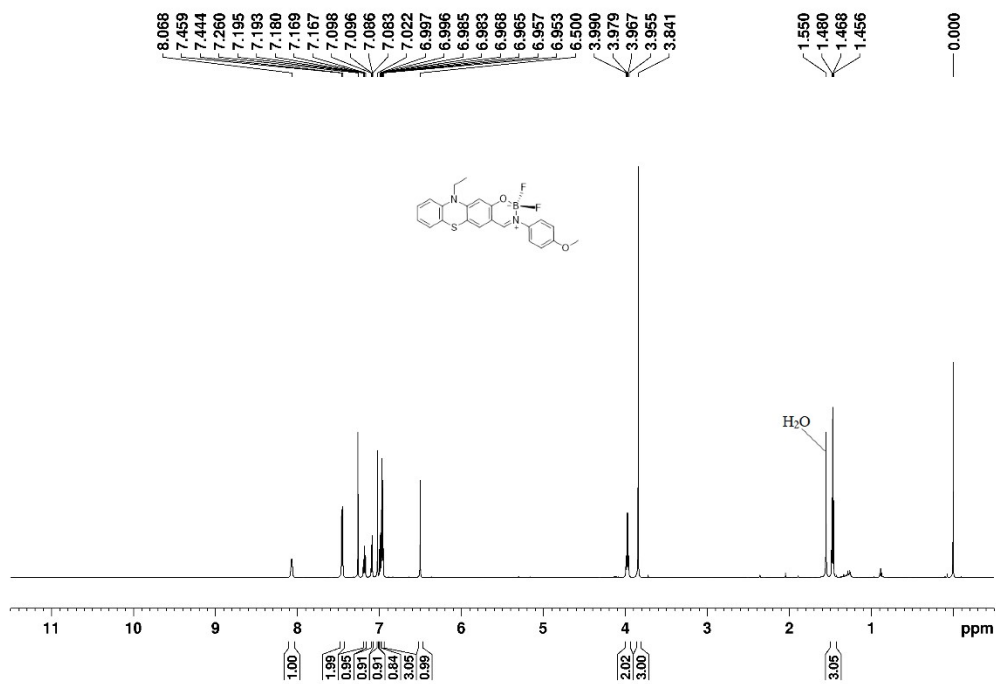

Figure S16. <sup>1</sup>H NMR spectrum of BPTZ2 in CDCl<sub>3</sub>.

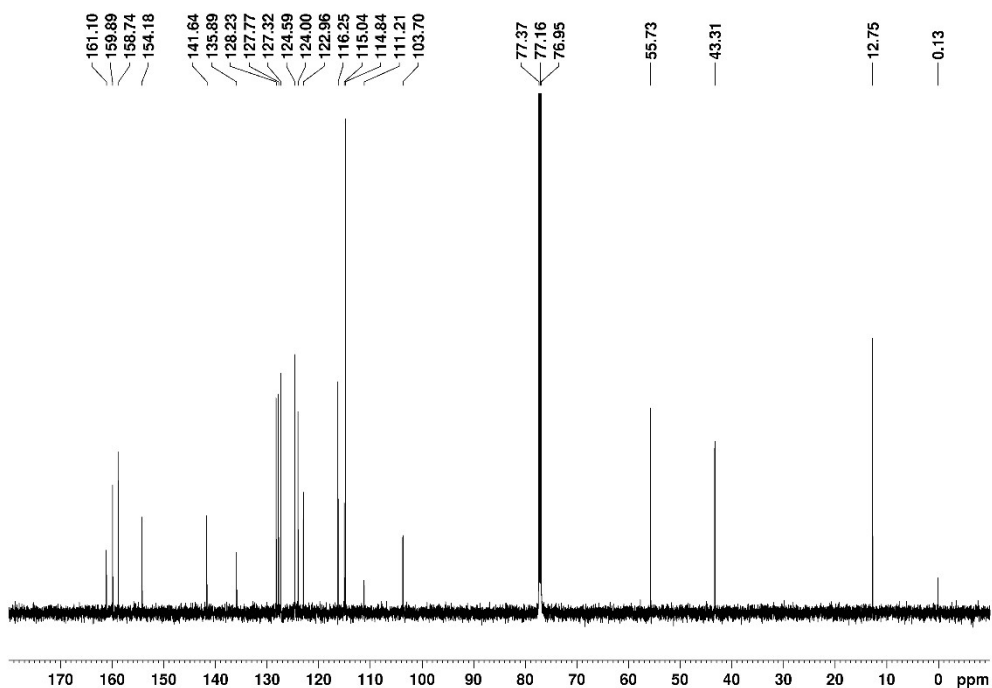

**Figure S17.**  $^{13}\text{C}$  NMR spectrum of **BPTZ2** in  $\text{CDCl}_3$ .

BPTZ2 #22 RT: 0.20 AV: 1 NL: 5.85E4  
 T: FTMS + p ESI Full ms [200.00-1000.00]

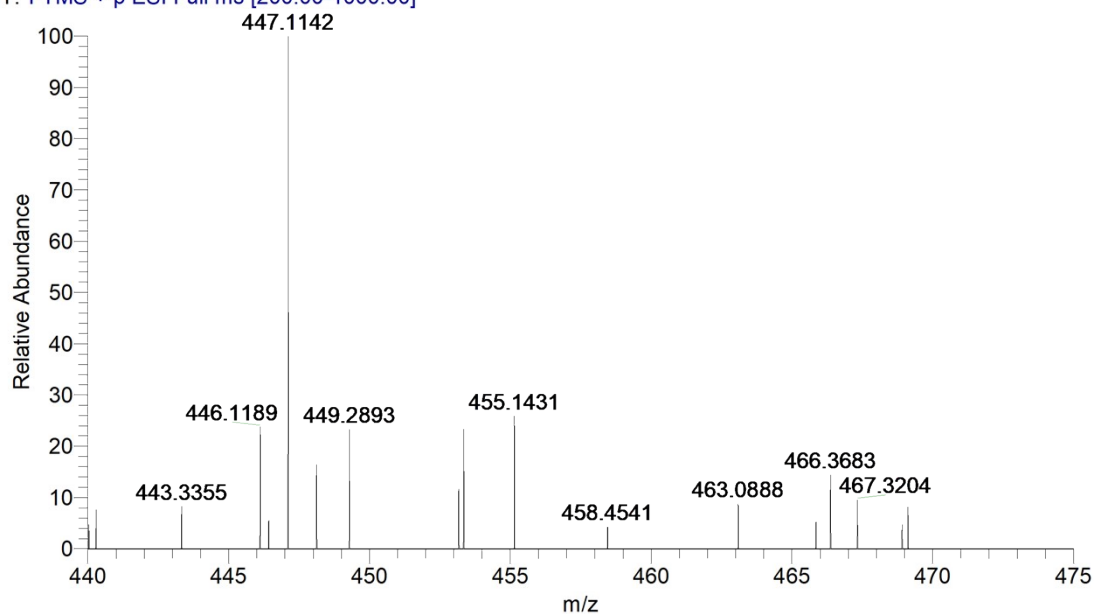

**Figure S18.** HRMS spectrum of **BPTZ2**.

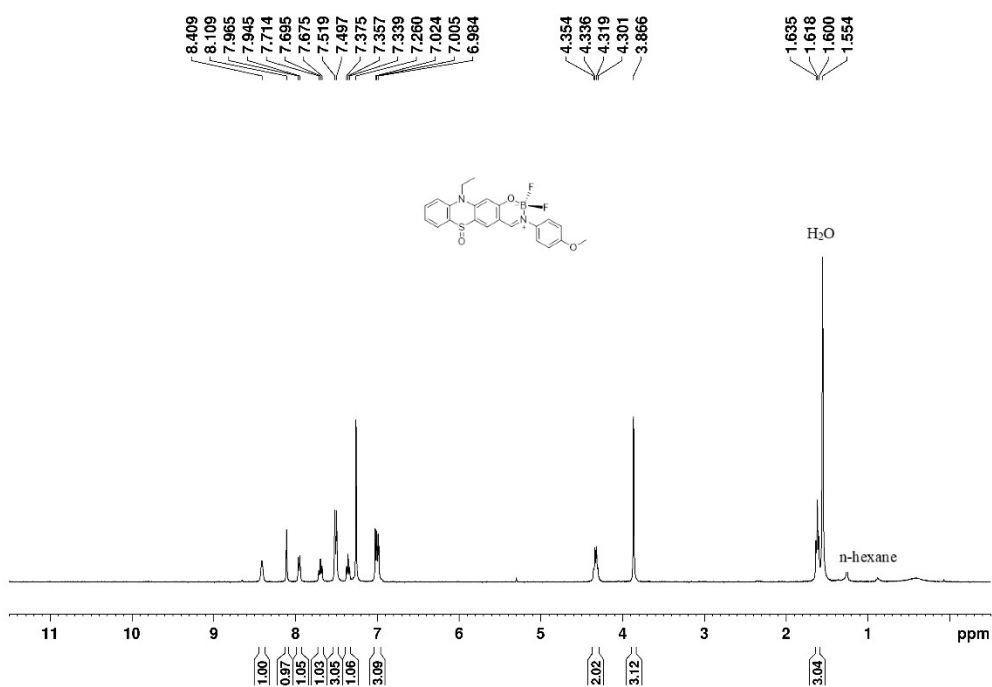

Figure S19. <sup>1</sup>H NMR spectrum of BPTZ2-O in CDCl<sub>3</sub>.

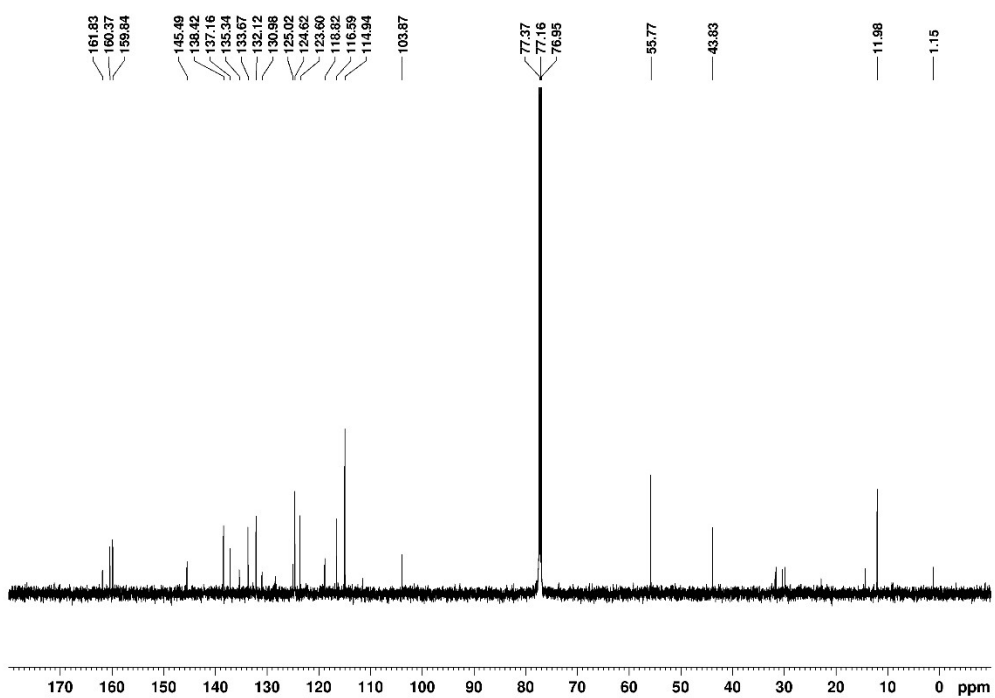

Figure S20. <sup>13</sup>C NMR spectrum of BPTZ2-O in CDCl<sub>3</sub>.

BPTZ2-O #19 RT: 0.17 AV: 1 NL: 1.47E5  
T: FTMS + p ESI Full ms [200.00-1000.00]

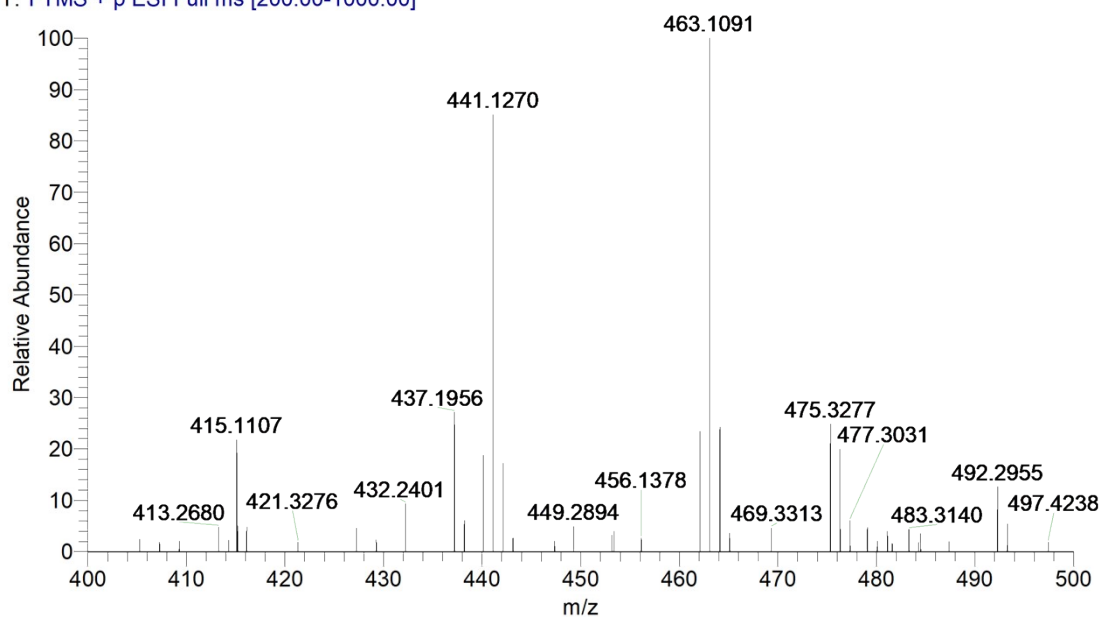

Figure S21. HRMS spectrum of BPTZ2-O.

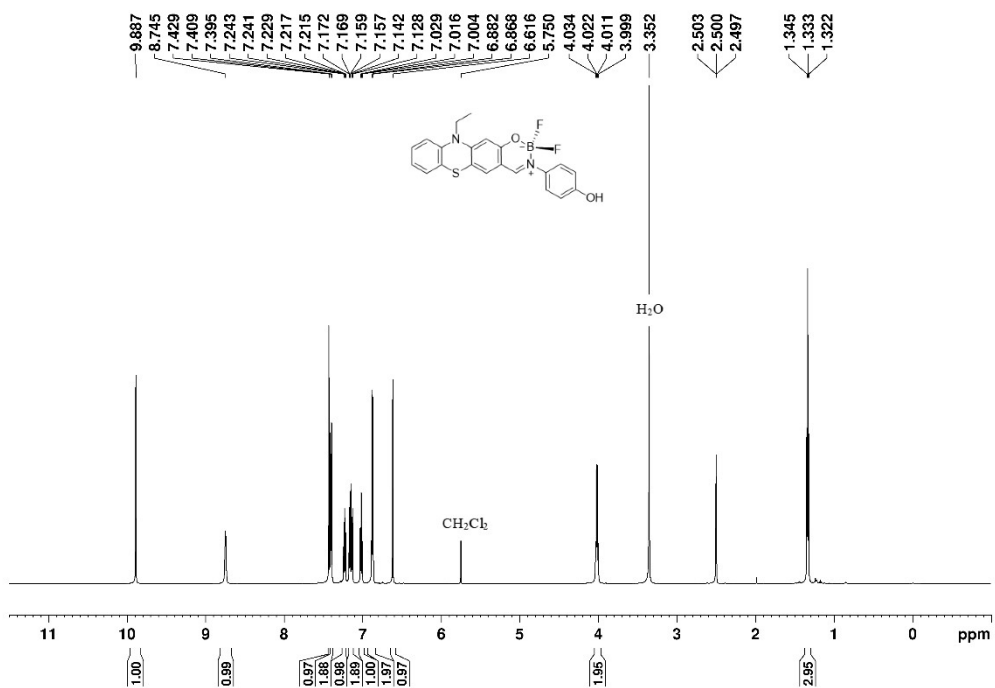

Figure S22. <sup>1</sup>H NMR spectrum of BPTZ3 in DMSO.

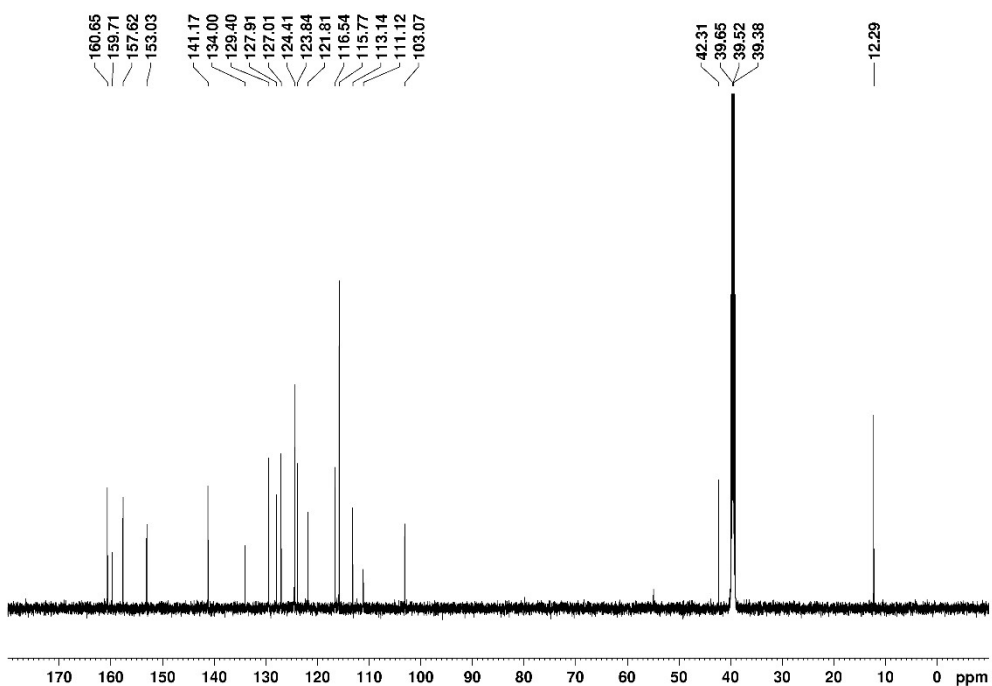

Figure S23.  $^{13}\text{C}$  NMR spectrum of **BPTZ3** in DMSO.

BPTZ3 #62 RT: 0.61 AV: 1 NL: 1.30E6  
 T: FTMS - p ESI Full ms [50.0000-750.0000]

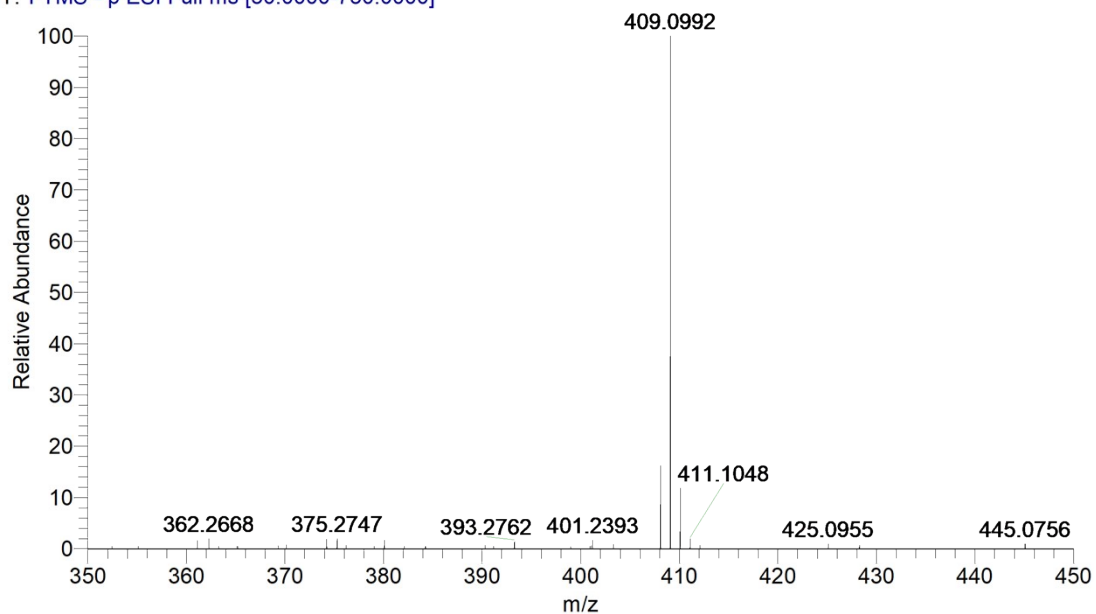

Figure S24. HRMS spectrum of **BPTZ3**.

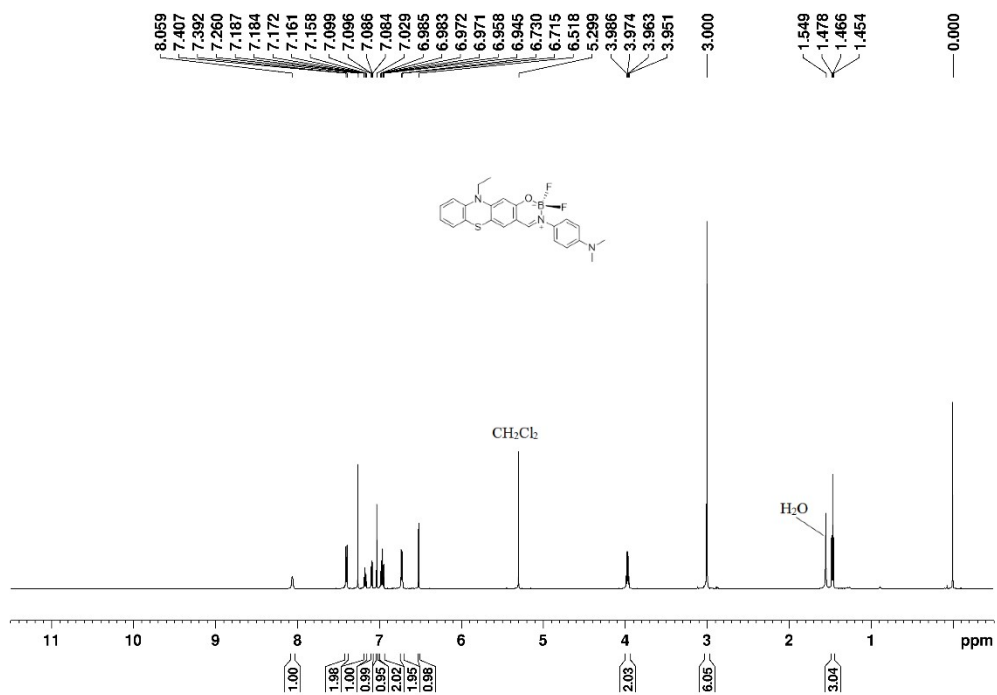

Figure S25. <sup>1</sup>H NMR spectrum of BPTZ4 in CDCl<sub>3</sub>.

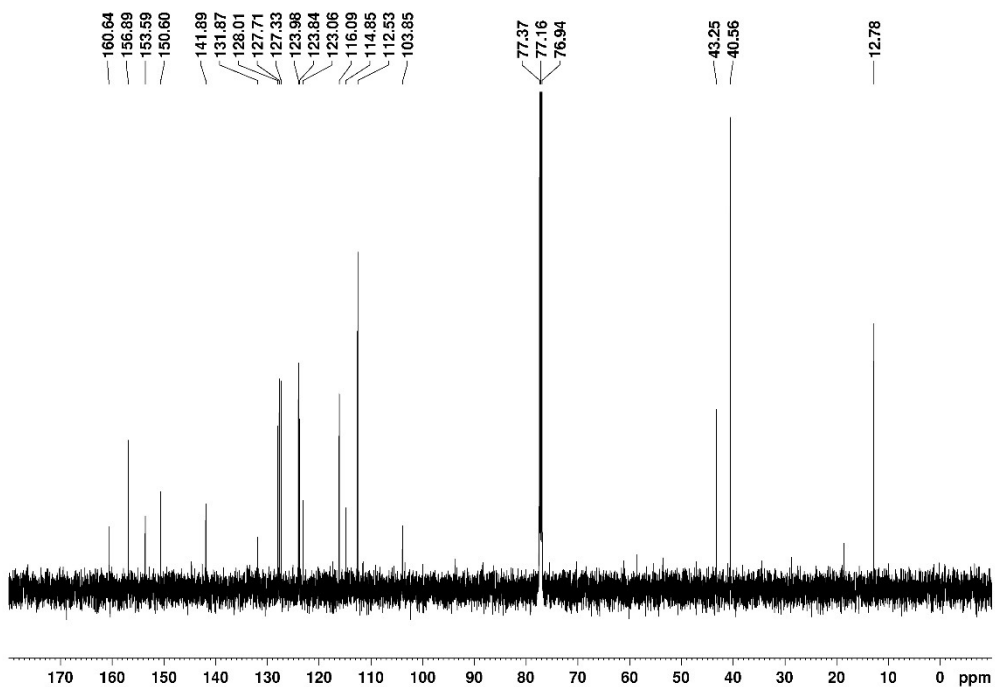

Figure S26. <sup>13</sup>C NMR spectrum of BPTZ4 in CDCl<sub>3</sub>.



BPTZ4 #47 RT: 0.40 AV: 1 NL: 4.96E5  
T: FTMS + p ESI Full ms [200.00-900.00]

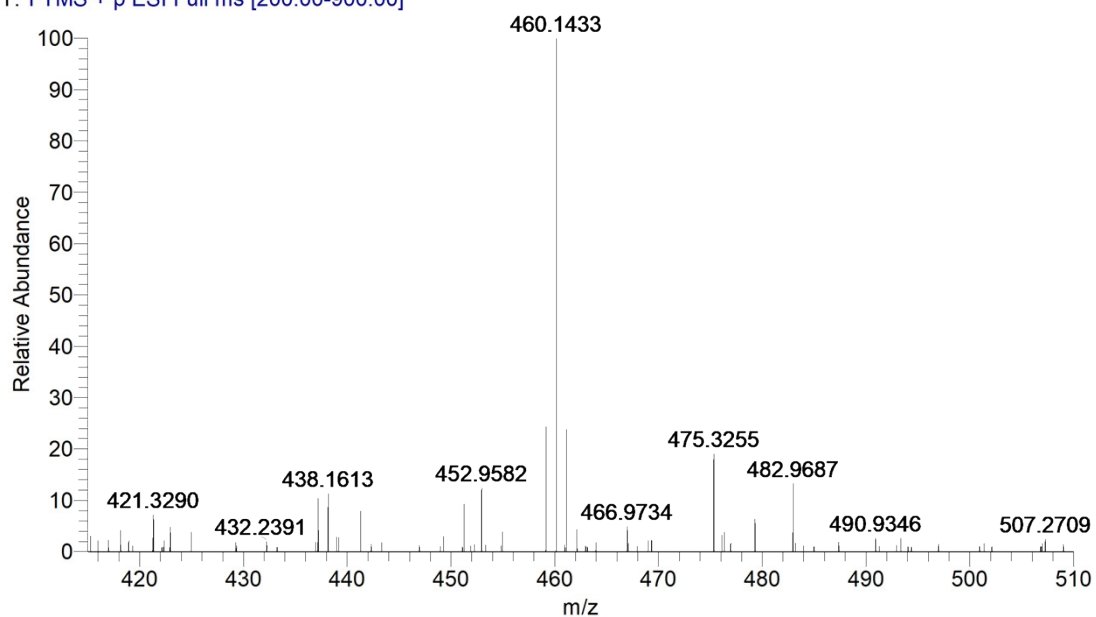

Figure S27. HRMS spectrum of BPTZ4.

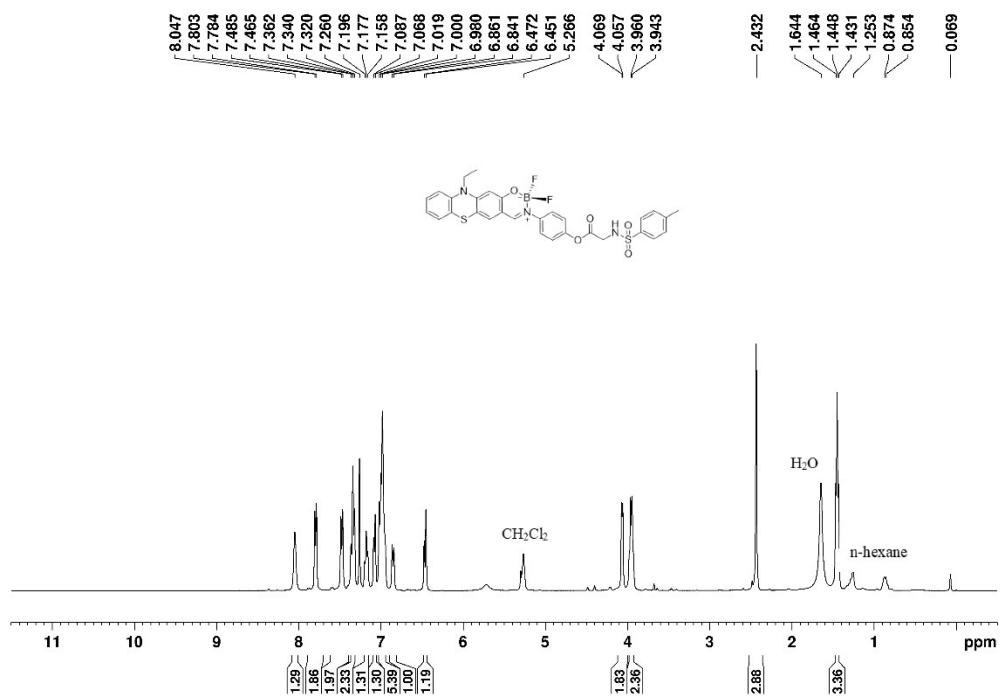

Figure S28. <sup>1</sup>H NMR spectrum of BPTZ5 in CDCl<sub>3</sub>.

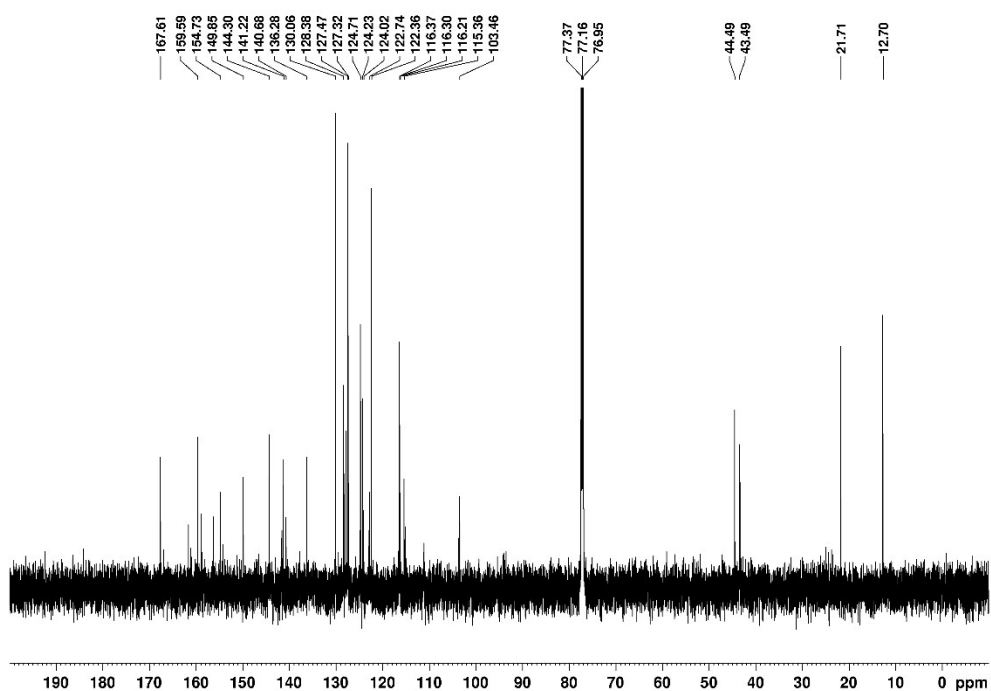

Figure S29.  $^{13}\text{C}$  NMR spectrum of **BPTZ5** in  $\text{CDCl}_3$ .

BPTZ5 #13 RT: 0.12 AV: 1 NL: 6.49E4  
 T: FTMS - p ESI Full ms [50.0000-750.0000]

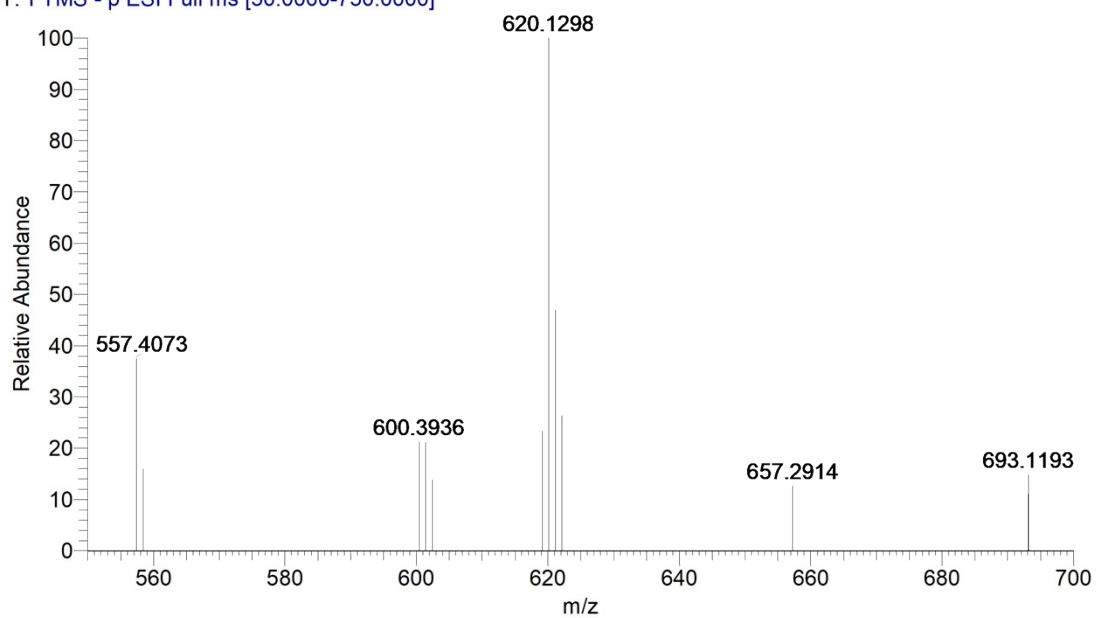

Figure S30. HRMS spectrum of **BPTZ5**.

## 6. References

1. S. Wang, B. Zhu, B. Wang, P. Fan, Y. Jiu, M. Zhang, L. Jiang and J.-T. Hou, *Dyes and Pigments*, 2020, **173**, 107933-107938.
2. D. A. Frath, S.; Ulrich, G.; Retailleau, P.; Ziessel, R., *Org. Lett.*, 2011, **13**, 3414-3417.
3. Y. Fang, W. Chen, W. Shi, H. Li, M. Xian and H. Ma, *Chem Commun (Camb)*, 2017, **53**, 8759-8762.
4. Q. Sun, J. Xu, C. Ji, M. S. S. Shaibani, Z. Li, K. Lim, C. Zhang, L. Li and Z. Liu, *Anal Chem*, 2020, **92**, 4038-4045.
5. W. Qiao, T. Ma, S. Wang, L. Li, M. Liu, H. Jiang, Y. Wu, J. Zhu and Z. a. Li, *Advanced Functional Materials*, 2021, **31**, 2105452.
6. W. Qiao, P. Yao, Y. Chen, Q. Xiao, L. Zhang and Z. a. Li, *Materials Chemistry Frontiers*, 2020, **4**, 2688-2696.
7. J. T. Hou, B. Wang, Y. Zou, P. Fan, X. Chang, X. Cao, S. Wang and F. Yu, *ACS Sens*, 2020, **5**, 1949-1958.
8. J. Han, S. Yang, B. Wang and X. Song, *Anal Chem*, 2021, **93**, 5194-5200.
9. J.-T. Hou, B. Wang, P. Fan, R. Duan, X. Cao, L. Zhu and S. Wang, *Dyes and Pigments*, 2020, **182**, 108675.
10. B. Deng, M. Ren, X. Kong, K. Zhou and W. Lin, *Sensors and Actuators B: Chemical*, 2018, **255**, 963-969.
11. M. Vedamalai, D. Kedaria, R. Vasita and I. Gupta, *Sensors and Actuators B: Chemical*, 2018, **263**, 137-142.
12. H. Xiao, K. Xin, H. Dou, G. Yin, Y. Quan and R. Wang, *Chem Commun (Camb)*, 2015, **51**, 1442-1445.
13. J. Liu, P. Niu, Y. Rong, W. Chen, X. Liu, L. Wei and X. Song, *Spectrochim Acta A Mol Biomol Spectrosc*, 2021, **261**, 120024.
14. H. Li, Y. Miao, Z. Liu, X. Wu, C. Piao and X. Zhou, *Dyes and Pigments*, 2020, **176**, 108192.
15. X. Bao, X. Cao, Y. Yuan, B. Zhou and C. Huo, *Sensors and Actuators B: Chemical*, 2021, **344**, 130210.
16. H. Cui, P. Hou, Y. Li, J. Sun, H. Zhang, Y. Zheng, Q. Liu and S. Chen, *Journal of Photochemistry and Photobiology A: Chemistry*, 2021, **417**, 113343.
17. P. Wu and H. Xiong, *Talanta*, 2022, **247**, 123584.
18. B. Wang, X. Guo, Z. Liu, Y. Wu and J.-T. Hou, *Chemical Research in Chinese Universities*, 2021, **38**, 609-615.
19. C. Liu, Q. Wang, X. Jiao, H. Yao, S. He, L. Zhao and X. Zeng, *Dyes and Pigments*, 2019, **160**, 989-994.
20. S. Wang, B. Zhu, B. Wang, X. Cao, L. Zhu, J.-T. Hou and L. Zeng, *Chinese Chemical Letters*, 2021, **32**, 1795-1798.
21. V. Natarajan, N. Thirumalaivasan, S. P. Wu and V. Sivan, *Org Biomol Chem*, 2019, **17**, 3538-3544.
22. B. Zhang, X. Yang, R. Zhang, Y. Liu, X. Ren, M. Xian, Y. Ye and Y. Zhao, *Anal Chem*, 2017, **89**, 10384-10390.
